# Supplementary material
Source: publisher figshare collection journal article supplement (https://gsajournals.figshare.com/ndownloader/files/22603394)
Supplement: Supplementary file 1 [file 22603394]

## Sheet: Homoeologous Network Modules
Table S4: Biological Process Gene Ontology terms enriched in co-expression modules in the homoeologous gene co-expression network
MODULE	NAME	SIZE	NOM p-val	FDR q-val
ME1	COPPER ION TRANSMEMBRANE TRANSPORT	39	0	0
ME1	LIGNIN CATABOLIC PROCESS	19	0	0
ME1	PHOSPHORELAY SIGNAL TRANSDUCTION SYSTEM	456	0	0.00209652
ME1	ETHYLENE-ACTIVATED SIGNALING PATHWAY	355	0	0.00243951
ME1	RESPONSE TO FREEZING	127	0	0.0040051
ME1	SUCROSE METABOLIC PROCESS	132	0	0.00333759
ME1	ZINC ION TRANSMEMBRANE TRANSPORT	30	0	0.00346583
ME1	TREHALOSE METABOLIC PROCESS	50	0	0.00423257
ME2	REGULATION OF TRANSLATIONAL FIDELITY	66	0	0
ME2	RIBOSOME ASSEMBLY	184	0	0
ME2	TRNA AMINOACYLATION	139	0	0
ME2	TRNA AMINOACYLATION FOR PROTEIN TRANSLATION	139	0	0
ME2	RNA METHYLATION	60	0	0
ME2	TUBULIN COMPLEX ASSEMBLY	41	0	0
ME2	RRNA MODIFICATION	45	0	0
ME2	PROTEIN IMPORT INTO MITOCHONDRIAL INNER MEMBRANE	19	0	0
ME2	RRNA METHYLATION	20	0	0
ME2	PSEUDOURIDINE SYNTHESIS	45	0	0
ME2	GTP BIOSYNTHETIC PROCESS	17	0	0
ME2	PROTEIN N-LINKED GLYCOSYLATION VIA ASPARAGINE	100	0	0.000334852
ME2	TRANSLATIONAL INITIATION	290	0	0.00061503
ME2	TRNA METHYLATION	30	0	0.000659796
ME2	PROTEIN N-LINKED GLYCOSYLATION	148	0	0.00105488
ME2	CTP BIOSYNTHETIC PROCESS	21	0	0.00148344
ME2	TRNA PROCESSING	287	0	0.00179352
ME2	PROTEIN TARGETING TO MITOCHONDRION	134	0	0.00222173
ME2	TELOMERE MAINTENANCE	172	0	0.00225217
ME2	FERROUS IRON TRANSPORT	48	0	0.00287538
ME2	GLYCEROL-3-PHOSPHATE METABOLIC PROCESS	16	0.00197239	0.00324087
ME2	CAROTENOID BIOSYNTHETIC PROCESS	100	0	0.00363927
ME2	7-METHYLGUANOSINE RNA CAPPING	73	0	0.00412942
ME2	FUMARATE METABOLIC PROCESS	16	0.0020284	0.00445499
ME2	ANAPHASE-PROMOTING COMPLEX-DEPENDENT PROTEASOMAL UBIQUITIN-DEPENDENT PROTEIN CATABOLIC PROCESS	284	0	0.00438261
ME2	RNA 3'-END PROCESSING	383	0	0.00426673
ME2	PROTEIN INSERTION INTO MEMBRANE	31	0.002	0.00460927
ME2	ERGOSTEROL BIOSYNTHETIC PROCESS	32	0.00406504	0.0047635
ME2	TRANSCRIPTION INITIATION FROM RNA POLYMERASE II PROMOTER	167	0	0.0047363
ME2	REGULATION OF DNA REPLICATION	172	0	0.00776436
ME2	RNA-DEPENDENT DNA REPLICATION	20	0	0.00755556
ME2	DNA REPLICATION	472	0	0.00878377
ME2	HISTONE DEACETYLATION	41	0	0.00893388
ME2	GLUCONEOGENESIS	100	0	0.00957532
ME2	DOUBLE-STRAND BREAK REPAIR VIA NONHOMOLOGOUS END JOINING	15	0.0116054	0.00930174
ME2	7-METHYLGUANOSINE MRNA CAPPING	65	0	0.00923659
ME2	PROTEIN METHYLATION	387	0	0.00985868
ME2	CARBON FIXATION	60	0	0.0100653
ME2	MRNA CATABOLIC PROCESS	399	0	0.0114818
ME2	POSITIVE REGULATION OF TRANSLATIONAL ELONGATION	29	0.00614754	0.0116372
ME2	DNA-TEMPLATED TRANSCRIPTION, INITIATION	263	0	0.0116485
ME2	SULFATE TRANSPORT	71	0	0.0114009
ME2	DNA-TEMPLATED TRANSCRIPTION, TERMINATION	229	0	0.0114149
ME2	PROTEIN DEACETYLATION	47	0.00421053	0.0121903
ME2	TRNA MODIFICATION	117	0	0.0130141
ME2	MITOCHONDRIAL TRANSPORT	217	0	0.0134724
ME2	LYSINE BIOSYNTHETIC PROCESS VIA DIAMINOPIMELATE	25	0.0102881	0.0133806
ME2	NEGATIVE REGULATION OF TRANSLATION	183	0	0.0148162
ME2	TRANSCRIPTION FROM RNA POLYMERASE III PROMOTER	101	0.00203666	0.019426
ME2	REMOVAL OF SUPEROXIDE RADICALS	16	0.0163265	0.0196744
ME2	NUCLEOSOME ASSEMBLY	193	0.00205339	0.0197605
ME2	DNA-DEPENDENT DNA REPLICATION	238	0	0.0220108
ME2	PYRIMIDINE NUCLEOTIDE BIOSYNTHETIC PROCESS	64	0.006	0.0232102
ME2	POSITIVE REGULATION OF AUTOPHAGY	18	0.0203666	0.0249836
ME2	1-AMINOCYCLOPROPANE-1-CARBOXYLATE BIOSYNTHETIC PROCESS	24	0.0139442	0.0250934
ME2	HISTIDINE BIOSYNTHETIC PROCESS	28	0.0159681	0.0249794
ME2	PROTEIN STABILIZATION	77	0	0.0247036
ME2	FATTY ACID BIOSYNTHETIC PROCESS	452	0	0.026513
ME2	SUPEROXIDE METABOLIC PROCESS	49	0.0100402	0.0272575
ME2	CELL CYCLE ARREST	347	0	0.0290592
ME2	ARGININE METABOLIC PROCESS	30	0.0182927	0.0364801
ME2	NUCLEOTIDE PHOSPHORYLATION	17	0.0178571	0.0373986
ME2	TRICARBOXYLIC ACID CYCLE	100	0.00201207	0.0398657
ME2	PROTEIN SECRETION	27	0.030426	0.0414324
ME2	GENE SILENCING BY RNA	196	0	0.0415234
ME2	PROTEIN IMPORT	377	0	0.0443897
ME2	PROTEIN REFOLDING	75	0.0120968	0.0455534
ME2	GLYCOLYSIS	204	0.00414079	0.045119
ME2	PTERIDINE-CONTAINING COMPOUND METABOLIC PROCESS	53	0.011236	0.0462535
ME2	NUCLEOTIDE BIOSYNTHETIC PROCESS	456	0	0.0471399
ME3	COPPER ION TRANSMEMBRANE TRANSPORT	39	0	0.00192077
ME3	LIGNIN CATABOLIC PROCESS	19	0	0.00120719
ME3	REGULATION OF MERISTEM STRUCTURAL ORGANIZATION	87	0	0.000804794
ME3	FLAVONOID BIOSYNTHETIC PROCESS	394	0	0.00167437
ME3	PHOSPHORELAY SIGNAL TRANSDUCTION SYSTEM	456	0	0.00210936
ME3	POLYSACCHARIDE CATABOLIC PROCESS	324	0	0.00294017
ME3	ETHYLENE-ACTIVATED SIGNALING PATHWAY	355	0	0.00345722
ME5	REGULATION OF TRANSLATIONAL FIDELITY	66	0	0
ME5	RIBOSOME ASSEMBLY	184	0	0
ME5	PROTEIN IMPORT INTO MITOCHONDRIAL INNER MEMBRANE	19	0	0
ME5	PROTEIN N-LINKED GLYCOSYLATION VIA ASPARAGINE	100	0	0
ME5	RNA METHYLATION	60	0	0
ME5	TRNA AMINOACYLATION	139	0	0
ME5	TRNA AMINOACYLATION FOR PROTEIN TRANSLATION	139	0	0
ME5	TUBULIN COMPLEX ASSEMBLY	41	0	0
ME5	RRNA MODIFICATION	45	0	0.000262675
ME5	PROTEIN N-LINKED GLYCOSYLATION	148	0	0.000236407
ME5	RRNA METHYLATION	20	0	0.000546266
ME5	MITOCHONDRIAL ELECTRON TRANSPORT, UBIQUINOL TO CYTOCHROME C	28	0	0.000728562
ME5	TRNA METHYLATION	30	0	0.000672519
ME5	GTP BIOSYNTHETIC PROCESS	17	0.00204499	0.00126174
ME5	ANAPHASE-PROMOTING COMPLEX-DEPENDENT PROTEASOMAL UBIQUITIN-DEPENDENT PROTEIN CATABOLIC PROCESS	284	0	0.00150879
ME5	POSITIVE REGULATION OF AUTOPHAGY	18	0	0.00150165
ME5	TRANSCRIPTION INITIATION FROM RNA POLYMERASE II PROMOTER	167	0	0.00141332
ME5	TRANSCRIPTION FROM RNA POLYMERASE III PROMOTER	101	0	0.00140299
ME5	RETROGRADE TRANSPORT, ENDOSOME TO GOLGI	74	0	0.00147324
ME5	CTP BIOSYNTHETIC PROCESS	21	0.00414938	0.00794889
ME5	7-METHYLGUANOSINE RNA CAPPING	73	0	0.00768872
ME5	PROTEIN IMPORT INTO MITOCHONDRIAL OUTER MEMBRANE	28	0	0.00745841
ME5	RESPIRATORY CHAIN COMPLEX IV ASSEMBLY	31	0.00230415	0.0080854
ME5	TRANSLATIONAL INITIATION	290	0	0.00875207
ME5	PROTEIN TARGETING TO MITOCHONDRION	134	0	0.009652
ME5	PROTEIN INSERTION INTO MEMBRANE	31	0.00207469	0.0131616
ME5	7-METHYLGUANOSINE MRNA CAPPING	65	0	0.0150627
ME5	RNA 3'-END PROCESSING	383	0	0.0240869
ME5	CARBON FIXATION	60	0	0.0236175
ME5	VESICLE DOCKING	52	0	0.0258673
ME5	RESPIRATORY ELECTRON TRANSPORT CHAIN	158	0	0.0279942
ME5	PROTEIN IMPORT	377	0	0.0275949
ME5	GPI ANCHOR BIOSYNTHETIC PROCESS	49	0.0083682	0.0341173
ME5	TRNA PROCESSING	287	0	0.0342846
ME5	GLUCONEOGENESIS	100	0	0.0343597
ME5	NUCLEOTIDE-EXCISION REPAIR	187	0	0.0366163
ME5	PHOSPHOLIPID BIOSYNTHETIC PROCESS	318	0	0.0388896
ME5	FATTY ACID BIOSYNTHETIC PROCESS	452	0	0.038929
ME5	ATP SYNTHESIS COUPLED ELECTRON TRANSPORT	98	0.0021978	0.0446914
ME5	REGULATION OF CYCLIN-DEPENDENT PROTEIN SERINE/THREONINE KINASE ACTIVITY	77	0.00201207	0.0448766
ME5	ATP SYNTHESIS COUPLED PROTON TRANSPORT	114	0	0.0485139
ME5	FUMARATE METABOLIC PROCESS	16	0.0280172	0.0477194
ME6	SUCROSE METABOLIC PROCESS	132	0	0.000486238
ME6	SUCROSE BIOSYNTHETIC PROCESS	68	0	0.00120887
ME6	RESPONSE TO DESICCATION	111	0	0.00146301
ME6	COPPER ION TRANSMEMBRANE TRANSPORT	39	0	0.00363114
ME6	AUTOPHAGIC VACUOLE ASSEMBLY	45	0	0.00387861
ME6	CYTOKININ METABOLIC PROCESS	68	0	0.00388634
ME6	CELLULAR COPPER ION HOMEOSTASIS	45	0	0.00347275
ME6	POLYSACCHARIDE CATABOLIC PROCESS	324	0	0.00429483
ME6	OLIGOSACCHARIDE BIOSYNTHETIC PROCESS	186	0	0.00462473
ME6	RECOGNITION OF POLLEN	71	0	0.00494475
ME6	AMINO ACID TRANSMEMBRANE TRANSPORT	98	0	0.0049339
ME6	OLIGOPEPTIDE TRANSPORT	139	0	0.00621998
ME6	PHOSPHORELAY SIGNAL TRANSDUCTION SYSTEM	456	0	0.00794389
ME6	WATER TRANSPORT	76	0	0.00778325
ME6	ETHYLENE-ACTIVATED SIGNALING PATHWAY	355	0	0.0080173
ME6	FLAVONOID BIOSYNTHETIC PROCESS	394	0	0.0075466
ME6	CHLOROPHYLL CATABOLIC PROCESS	39	0.00164204	0.0101275
ME6	RESPONSE TO FREEZING	127	0	0.0172293
ME6	OLIGOSACCHARIDE METABOLIC PROCESS	334	0	0.0191559
ME6	COPPER ION TRANSPORT	55	0.00646204	0.0192746
ME6	(1->3)-BETA-D-GLUCAN BIOSYNTHETIC PROCESS	33	0.010582	0.0187748
ME6	CELL WALL MODIFICATION	449	0	0.0274515
ME6	REGULATION OF MERISTEM STRUCTURAL ORGANIZATION	87	0.00315956	0.03017
ME6	TREHALOSE METABOLIC PROCESS	50	0.012987	0.0313586
ME6	POTASSIUM ION TRANSMEMBRANE TRANSPORT	144	0.00147493	0.0302181
ME6	LIGNIN CATABOLIC PROCESS	19	0.0303571	0.0429798
ME7	DNA METHYLATION	85	0	0
ME7	CHROMATIN REMODELING	209	0	0
ME7	REGULATION OF MERISTEM STRUCTURAL ORGANIZATION	87	0	0.000241525
ME7	ATP-DEPENDENT CHROMATIN REMODELING	66	0	0.000366209
ME7	LIGNIN CATABOLIC PROCESS	19	0	0.00496266
ME7	SPLICEOSOMAL COMPLEX ASSEMBLY	129	0	0.00413555
ME7	TRYPTOPHAN BIOSYNTHETIC PROCESS	61	0	0.00418779
ME7	GENE SILENCING BY RNA	196	0	0.00412157
ME7	GENE SILENCING	454	0	0.00765164
ME7	HISTONE LYSINE METHYLATION	257	0	0.0312183
ME7	REGULATION OF CELL SHAPE	315	0	0.0348217
ME7	PROTEIN-TETRAPYRROLE LINKAGE	16	0.0155172	0.0351152
ME7	REGULATION OF PHOSPHOPROTEIN PHOSPHATASE ACTIVITY	48	0	0.0392084
ME7	REGULATION OF CHLOROPHYLL BIOSYNTHETIC PROCESS	80	0	0.0368791
ME7	GLYCOGEN BIOSYNTHETIC PROCESS	64	0.00299401	0.0359459
ME7	AROMATIC AMINO ACID FAMILY BIOSYNTHETIC PROCESS	119	0	0.0393784
ME7	COENZYME A BIOSYNTHETIC PROCESS	17	0.015025	0.0470565
ME8	RESPIRATORY ELECTRON TRANSPORT CHAIN	158	0	0
ME8	ATP SYNTHESIS COUPLED ELECTRON TRANSPORT	98	0	0
ME8	RETROGRADE VESICLE-MEDIATED TRANSPORT, GOLGI TO ER	130	0	0
ME8	EXTRACELLULAR POLYSACCHARIDE BIOSYNTHETIC PROCESS	89	0	0
ME8	MITOCHONDRIAL ELECTRON TRANSPORT, UBIQUINOL TO CYTOCHROME C	28	0	0
ME8	ATP SYNTHESIS COUPLED PROTON TRANSPORT	114	0	0
ME8	MITOCHONDRIAL ELECTRON TRANSPORT, NADH TO UBIQUINONE	43	0	0
ME8	TRICARBOXYLIC ACID CYCLE	100	0	0
ME8	ATP HYDROLYSIS COUPLED PROTON TRANSPORT	126	0	0
ME8	AEROBIC RESPIRATION	224	0	0
ME8	CELLULAR COPPER ION HOMEOSTASIS	45	0	0
ME8	NUCLEOTIDE-SUGAR TRANSPORT	109	0	0
ME8	LIPOATE BIOSYNTHETIC PROCESS	23	0	0
ME8	INTRA-GOLGI VESICLE-MEDIATED TRANSPORT	119	0	0.000319274
ME8	PROTEIN GLYCOSYLATION	293	0	0.000297989
ME8	ER TO GOLGI VESICLE-MEDIATED TRANSPORT	299	0	0.000279365
ME8	GLYOXYLATE CYCLE	55	0	0.000262932
ME8	PROTON TRANSPORT	257	0	0.000248325
ME8	NUCLEOTIDE-SUGAR METABOLIC PROCESS	98	0	0.000235255
ME8	REGULATION OF PH	80	0	0.000223492
ME8	PROTEIN RETENTION IN ER LUMEN	51	0	0.00021285
ME8	ELECTRON TRANSPORT CHAIN	422	0	0.000203175
ME8	RESPIRATORY GASEOUS EXCHANGE	29	0	0.000194341
ME8	ATP BIOSYNTHETIC PROCESS	175	0	0.000307082
ME8	CELLULAR IRON ION HOMEOSTASIS	137	0	0.000294799
ME8	VACUOLAR TRANSPORT	320	0	0.000283461
ME8	VESICLE FUSION WITH GOLGI APPARATUS	51	0	0.000378705
ME8	GLYCINE CATABOLIC PROCESS	45	0	0.000694433
ME8	PURINE RIBONUCLEOSIDE MONOPHOSPHATE BIOSYNTHETIC PROCESS	209	0	0.000777706
ME8	PEROXISOME FISSION	28	0	0.00158431
ME8	ISOCITRATE METABOLIC PROCESS	19	0	0.0016803
ME8	GLYCOLYSIS	204	0	0.00212443
ME8	LIGNIN CATABOLIC PROCESS	19	0	0.00310046
ME8	PURINE RIBONUCLEOTIDE BIOSYNTHETIC PROCESS	271	0	0.0043041
ME8	RIBONUCLEOSIDE MONOPHOSPHATE BIOSYNTHETIC PROCESS	243	0	0.00518269
ME8	GLUCOSE CATABOLIC PROCESS	297	0	0.00538176
ME8	PURINE NUCLEOTIDE BIOSYNTHETIC PROCESS	281	0	0.00557254
ME8	PROTEIN N-LINKED GLYCOSYLATION	148	0	0.00762126
ME8	CLATHRIN COAT ASSEMBLY	18	0.00468384	0.00753562
ME8	CELLULOSE BIOSYNTHETIC PROCESS	85	0.00276243	0.00764531
ME8	REGULATION OF ARF PROTEIN SIGNAL TRANSDUCTION	80	0	0.00745883
ME8	ACYL-COA METABOLIC PROCESS	149	0	0.00791948
ME8	HEME TRANSPORT	22	0.00236967	0.00940202
ME8	GLUCOSE METABOLIC PROCESS	452	0	0.00929478
ME8	MITOCHONDRIAL TRANSPORT	217	0	0.00957729
ME8	COPPER ION TRANSMEMBRANE TRANSPORT	39	0.00246914	0.00959339
ME8	METHIONINE METABOLIC PROCESS	66	0.00478469	0.00957474
ME8	CYTOCHROME COMPLEX ASSEMBLY	41	0	0.0103335
ME8	AUTOPHAGIC VACUOLE ASSEMBLY	45	0	0.0112509
ME8	COPPER ION TRANSPORT	55	0	0.0111124
ME8	GLYCINE METABOLIC PROCESS	57	0.00249377	0.0121037
ME8	GLYCINE DECARBOXYLATION VIA GLYCINE CLEAVAGE SYSTEM	22	0.00936768	0.0124276
ME8	ONE-CARBON METABOLIC PROCESS	58	0.0075188	0.0125966
ME8	EXOCYTOSIS	214	0	0.0168705
ME8	COPII VESICLE COATING	18	0.0140515	0.0171335
ME8	MOLYBDOPTERIN COFACTOR BIOSYNTHETIC PROCESS	30	0.0075188	0.0182131
ME8	MALATE METABOLIC PROCESS	35	0.00481928	0.0200336
ME8	MO-MOLYBDOPTERIN COFACTOR BIOSYNTHETIC PROCESS	29	0.0120192	0.0199584
ME8	CELL WALL MACROMOLECULE CATABOLIC PROCESS	57	0	0.0199215
ME8	VESICLE DOCKING	52	0.00508906	0.0206364
ME8	PROTEIN POLYMERIZATION	246	0	0.0207576
ME8	NUCLEOTIDE BIOSYNTHETIC PROCESS	456	0	0.0255838
ME8	GPI ANCHOR METABOLIC PROCESS	70	0	0.028711
ME8	GLUCONEOGENESIS	100	0	0.0296474
ME8	REGULATION OF ARF GTPASE ACTIVITY	56	0.0158311	0.0295764
ME8	ANAPHASE-PROMOTING COMPLEX-DEPENDENT PROTEASOMAL UBIQUITIN-DEPENDENT PROTEIN CATABOLIC PROCESS	284	0	0.0303087
ME8	CERAMIDE METABOLIC PROCESS	64	0.00742574	0.0306961
ME8	REGULATION OF ACTIN FILAMENT POLYMERIZATION	89	0.00731707	0.0331327
ME8	ACTIN FILAMENT POLYMERIZATION	83	0.0111111	0.0351315
ME8	AMINO ACID TRANSPORT	255	0	0.035512
ME8	CELL ADHESION	201	0.00630915	0.0350548
ME8	PENTOSE-PHOSPHATE SHUNT	102	0.00568182	0.0365112
ME8	IRON-SULFUR CLUSTER ASSEMBLY	46	0.0102564	0.0362374
ME8	TRANSLATIONAL INITIATION	290	0	0.0384386
ME8	PYRUVATE METABOLIC PROCESS	94	0.00283286	0.0400149
ME8	IRON ION TRANSPORT	211	0	0.0401205
ME8	REGULATION OF TRANSLATIONAL INITIATION	99	0.00852273	0.044147
ME8	METHIONINE BIOSYNTHETIC PROCESS	62	0.0170732	0.046185
ME8	RETROGRADE TRANSPORT, ENDOSOME TO GOLGI	74	0.00779221	0.0476797
ME9	CELLULAR COPPER ION HOMEOSTASIS	45	0	0
ME9	AUTOPHAGIC VACUOLE ASSEMBLY	45	0	0
ME9	VACUOLAR TRANSPORT	320	0	0
ME9	VESICLE FUSION WITH GOLGI APPARATUS	51	0	0
ME9	INTRA-GOLGI VESICLE-MEDIATED TRANSPORT	119	0	0.000627117
ME9	PROTEIN ADP-RIBOSYLATION	49	0	0.0016402
ME9	LIPOATE BIOSYNTHETIC PROCESS	23	0	0.00140589
ME9	ATP HYDROLYSIS COUPLED PROTON TRANSPORT	126	0	0.00254243
ME9	RETROGRADE VESICLE-MEDIATED TRANSPORT, GOLGI TO ER	130	0	0.00225994
ME9	RESPIRATORY GASEOUS EXCHANGE	29	0	0.00203394
ME9	AUTOPHAGY	168	0	0.00204003
ME9	RESPIRATORY ELECTRON TRANSPORT CHAIN	158	0	0.00187002
ME9	ER TO GOLGI VESICLE-MEDIATED TRANSPORT	299	0	0.00188009
ME9	RETROGRADE TRANSPORT, ENDOSOME TO GOLGI	74	0	0.0018951
ME9	ATP SYNTHESIS COUPLED ELECTRON TRANSPORT	98	0	0.00223605
ME9	CYTOCHROME COMPLEX ASSEMBLY	41	0	0.0020963
ME9	ATP SYNTHESIS COUPLED PROTON TRANSPORT	114	0	0.00284465
ME9	COPPER ION TRANSPORT	55	0	0.00302757
ME9	REGULATION OF PH	80	0	0.00414893
ME9	MITOCHONDRIAL ELECTRON TRANSPORT, UBIQUINOL TO CYTOCHROME C	28	0.00220264	0.00606188
ME9	PROTEIN KINASE C-ACTIVATING G-PROTEIN COUPLED RECEPTOR SIGNALING PATHWAY	30	0	0.00840726
ME9	COPPER ION TRANSMEMBRANE TRANSPORT	39	0	0.0085611
ME9	G-PROTEIN COUPLED RECEPTOR SIGNALING PATHWAY	143	0	0.00831903
ME9	CELL WALL MACROMOLECULE CATABOLIC PROCESS	57	0	0.0107754
ME9	EXOCYTOSIS	214	0	0.0107339
ME9	CLATHRIN COAT ASSEMBLY	18	0.00858369	0.0106403
ME9	CELL REDOX HOMEOSTASIS	275	0	0.0103638
ME9	PEROXISOME FISSION	28	0.00813008	0.0167652
ME9	FATTY ACID BETA-OXIDATION	104	0	0.0177488
ME9	ELECTRON TRANSPORT CHAIN	422	0	0.0205838
ME9	CHITIN CATABOLIC PROCESS	27	0.0154867	0.0236592
ME9	LIPID CATABOLIC PROCESS	293	0	0.0232057
ME9	REGULATION OF ARF GTPASE ACTIVITY	56	0	0.0254397
ME9	AMINO ACID TRANSMEMBRANE TRANSPORT	98	0	0.0332197
ME9	PEROXISOME ORGANIZATION	90	0.00224719	0.0329977
ME9	VESICLE DOCKING	52	0.00675676	0.0326915
ME9	PROTON TRANSPORT	257	0	0.031808
ME9	CELLULAR IRON ION HOMEOSTASIS	137	0	0.0312197
ME9	RESPIRATORY CHAIN COMPLEX IV ASSEMBLY	31	0.0138889	0.0362231
ME9	CHROMOSOME CONDENSATION	49	0.0157658	0.0371299
ME9	PROTEIN RETENTION IN ER LUMEN	51	0.00209644	0.037955
ME9	SUCROSE METABOLIC PROCESS	132	0.00697674	0.0411978
ME9	ACTIN FILAMENT POLYMERIZATION	83	0.00442478	0.0429593
ME9	PROTEIN POLYMERIZATION	246	0	0.0432399
ME9	REGULATION OF ARF PROTEIN SIGNAL TRANSDUCTION	80	0.00226244	0.0437358
ME9	RESPONSE TO DESICCATION	111	0.00464037	0.0437946
ME9	ETHANOL OXIDATION	18	0.0357895	0.0436858
ME10	RRNA MODIFICATION	45	0	0
ME10	PSEUDOURIDINE SYNTHESIS	45	0	0
ME10	GENE SILENCING BY RNA	196	0	0
ME10	DNA METHYLATION	85	0	0
ME10	TRNA AMINOACYLATION	139	0	0
ME10	RNA METHYLATION	60	0	0
ME10	TRNA AMINOACYLATION FOR PROTEIN TRANSLATION	139	0	0
ME10	ATP-DEPENDENT CHROMATIN REMODELING	66	0	0
ME10	CHROMATIN REMODELING	209	0	0
ME10	TUBULIN COMPLEX ASSEMBLY	41	0	0
ME10	TRNA PROCESSING	287	0	0
ME10	RRNA METHYLATION	20	0	7.77491e-05
ME10	REGULATION OF DNA REPLICATION	172	0	0.000211755
ME10	DOUBLE-STRAND BREAK REPAIR VIA NONHOMOLOGOUS END JOINING	15	0	0.000263617
ME10	FERROUS IRON TRANSPORT	48	0	0.000372031
ME10	SPLICEOSOMAL COMPLEX ASSEMBLY	129	0	0.000697178
ME10	ARGININE METABOLIC PROCESS	30	0.00178891	0.00135205
ME10	AROMATIC AMINO ACID FAMILY BIOSYNTHETIC PROCESS	119	0	0.00127694
ME10	TRNA METHYLATION	30	0	0.00149102
ME10	RNA-DEPENDENT DNA REPLICATION	20	0	0.00146513
ME10	TRNA MODIFICATION	117	0	0.00184202
ME10	DNA REPLICATION	472	0	0.00184452
ME10	HISTONE DEACETYLATION	41	0	0.00204386
ME10	DNA TOPOLOGICAL CHANGE	25	0	0.00218888
ME10	CHLOROPHYLL BIOSYNTHETIC PROCESS	164	0	0.00217446
ME10	GENE SILENCING	454	0	0.00223375
ME10	NUCLEOSOME ASSEMBLY	193	0	0.00215102
ME10	GLYCEROL-3-PHOSPHATE METABOLIC PROCESS	16	0	0.00260289
ME10	PROTEIN IMPORT INTO MITOCHONDRIAL INNER MEMBRANE	19	0.00575816	0.00519547
ME10	PROTEIN DEACETYLATION	47	0	0.00650584
ME10	DNA-TEMPLATED TRANSCRIPTION, INITIATION	263	0	0.00638327
ME10	AROMATIC AMINO ACID FAMILY METABOLIC PROCESS	172	0	0.00970275
ME10	PORPHYRIN-CONTAINING COMPOUND BIOSYNTHETIC PROCESS	222	0	0.00940872
ME10	CHROMATIN ASSEMBLY OR DISASSEMBLY	278	0	0.00931915
ME10	RNA 3'-END PROCESSING	383	0	0.00975358
ME10	CHORISMATE METABOLIC PROCESS	15	0.00738007	0.00953353
ME10	PROTEIN METHYLATION	387	0	0.00964933
ME10	TELOMERE MAINTENANCE	172	0	0.00985776
ME10	THYLAKOID MEMBRANE ORGANIZATION	77	0.00174825	0.0101556
ME10	REGULATION OF TRANSLATIONAL FIDELITY	66	0.0037594	0.0103639
ME10	PYRIMIDINE NUCLEOTIDE BIOSYNTHETIC PROCESS	64	0	0.0105447
ME10	DNA-TEMPLATED TRANSCRIPTION, TERMINATION	229	0	0.0109723
ME10	REGULATION OF CHLOROPHYLL BIOSYNTHETIC PROCESS	80	0	0.0110168
ME10	PATHOGENESIS	19	0.0129151	0.0108707
ME10	PROTEIN STABILIZATION	77	0.00344828	0.0118787
ME10	RIBOSOME ASSEMBLY	184	0	0.0118811
ME10	MRNA CATABOLIC PROCESS	399	0	0.0145736
ME10	SULFATE TRANSPORT	71	0.0017452	0.0146554
ME10	TETRAPYRROLE BIOSYNTHETIC PROCESS	242	0	0.0163362
ME10	DNA-DEPENDENT DNA REPLICATION	238	0	0.0192322
ME10	DNA RECOMBINATION	442	0	0.019928
ME10	DOUBLE-STRAND BREAK REPAIR	230	0	0.021867
ME10	1-AMINOCYCLOPROPANE-1-CARBOXYLATE BIOSYNTHETIC PROCESS	24	0.016129	0.0218057
ME10	POLY(A)+ MRNA EXPORT FROM NUCLEUS	39	0.0167598	0.0230419
ME10	CAROTENOID BIOSYNTHETIC PROCESS	100	0.00186916	0.0229941
ME10	RRNA CATABOLIC PROCESS	33	0.0150943	0.0244021
ME10	ATP CATABOLIC PROCESS	410	0	0.0248127
ME10	LYSINE BIOSYNTHETIC PROCESS VIA DIAMINOPIMELATE	25	0.0216607	0.0290959
ME10	GTP BIOSYNTHETIC PROCESS	17	0.0188679	0.0299221
ME10	MRNA CLEAVAGE	68	0.00905797	0.0352369
ME10	HISTONE LYSINE METHYLATION	257	0	0.0402616
ME10	PROTEIN REFOLDING	75	0.0123894	0.0418666
ME10	PROTEIN TARGETING TO MITOCHONDRION	134	0.00699301	0.0451435
ME10	THIAMINE BIOSYNTHETIC PROCESS	29	0.040708	0.0452748
ME11	RIBOSOME ASSEMBLY	184	0	0
ME11	REGULATION OF TRANSLATIONAL FIDELITY	66	0	0
ME11	TRNA AMINOACYLATION FOR PROTEIN TRANSLATION	139	0	0
ME11	TRNA AMINOACYLATION	139	0	0
ME11	PROTEIN N-LINKED GLYCOSYLATION	148	0	0
ME11	TRICARBOXYLIC ACID CYCLE	100	0	0
ME11	PROTEIN N-LINKED GLYCOSYLATION VIA ASPARAGINE	100	0	0
ME11	TUBULIN COMPLEX ASSEMBLY	41	0	0
ME11	TRANSLATIONAL INITIATION	290	0	0
ME11	RESPIRATORY ELECTRON TRANSPORT CHAIN	158	0	0
ME11	ATP SYNTHESIS COUPLED ELECTRON TRANSPORT	98	0	0
ME11	RRNA MODIFICATION	45	0	0
ME11	MITOCHONDRIAL ELECTRON TRANSPORT, UBIQUINOL TO CYTOCHROME C	28	0	0
ME11	PROTEIN IMPORT INTO MITOCHONDRIAL INNER MEMBRANE	19	0	0
ME11	PROTEIN TARGETING TO MITOCHONDRION	134	0	0
ME11	PSEUDOURIDINE SYNTHESIS	45	0	0
ME11	GLYCOLYSIS	204	0	0
ME11	ACYL-COA METABOLIC PROCESS	149	0	0
ME11	ATP SYNTHESIS COUPLED PROTON TRANSPORT	114	0	0
ME11	MITOCHONDRIAL TRANSPORT	217	0	0
ME11	GLUCONEOGENESIS	100	0	0
ME11	ANAPHASE-PROMOTING COMPLEX-DEPENDENT PROTEASOMAL UBIQUITIN-DEPENDENT PROTEIN CATABOLIC PROCESS	284	0	0
ME11	RNA METHYLATION	60	0	0
ME11	AEROBIC RESPIRATION	224	0	0
ME11	GTP BIOSYNTHETIC PROCESS	17	0	0
ME11	POSITIVE REGULATION OF TRANSLATIONAL ELONGATION	29	0	5.74489e-05
ME11	MITOCHONDRIAL ELECTRON TRANSPORT, NADH TO UBIQUINONE	43	0	5.53211e-05
ME11	GLUCOSE CATABOLIC PROCESS	297	0	5.33454e-05
ME11	HISTIDINE BIOSYNTHETIC PROCESS	28	0	0.000105759
ME11	CARBON FIXATION	60	0	0.000102233
ME11	RIBONUCLEOSIDE MONOPHOSPHATE BIOSYNTHETIC PROCESS	243	0	0.000304679
ME11	MALATE METABOLIC PROCESS	35	0	0.000340965
ME11	RRNA METHYLATION	20	0	0.000330633
ME11	LYSINE BIOSYNTHETIC PROCESS VIA DIAMINOPIMELATE	25	0	0.000320908
ME11	FUMARATE METABOLIC PROCESS	16	0	0.000355242
ME11	GLYCEROL-3-PHOSPHATE METABOLIC PROCESS	16	0	0.000386346
ME11	PURINE RIBONUCLEOSIDE MONOPHOSPHATE BIOSYNTHETIC PROCESS	209	0	0.000420199
ME11	ONE-CARBON METABOLIC PROCESS	58	0	0.000409141
ME11	PURINE NUCLEOTIDE BIOSYNTHETIC PROCESS	281	0	0.00039865
ME11	PURINE RIBONUCLEOTIDE BIOSYNTHETIC PROCESS	271	0	0.000468007
ME11	RNA 3'-END PROCESSING	383	0	0.000528826
ME11	GLUCOSE METABOLIC PROCESS	452	0	0.000516235
ME11	TRNA PROCESSING	287	0	0.000537493
ME11	CELL CYCLE ARREST	347	0	0.000594522
ME11	PENTOSE-PHOSPHATE SHUNT	102	0	0.000581311
ME11	CAROTENOID BIOSYNTHETIC PROCESS	100	0	0.000671549
ME11	NUCLEOTIDE BIOSYNTHETIC PROCESS	456	0	0.000720626
ME11	COFACTOR BIOSYNTHETIC PROCESS	469	0	0.000773203
ME11	PROTEIN SECRETION	27	0	0.00107252
ME11	NUCLEOTIDE PHOSPHORYLATION	17	0	0.00129694
ME11	ISOCITRATE METABOLIC PROCESS	19	0.0043956	0.00135733
ME11	PROTEIN IMPORT INTO MITOCHONDRIAL OUTER MEMBRANE	28	0	0.00187861
ME11	GLYCINE DECARBOXYLATION VIA GLYCINE CLEAVAGE SYSTEM	22	0	0.00193689
ME11	FERROUS IRON TRANSPORT	48	0	0.00204504
ME11	PROTEIN IMPORT	377	0	0.00200786
ME11	PTERIDINE-CONTAINING COMPOUND METABOLIC PROCESS	53	0	0.001972
ME11	PORPHYRIN-CONTAINING COMPOUND BIOSYNTHETIC PROCESS	222	0	0.00202237
ME11	METHIONINE METABOLIC PROCESS	66	0	0.00209998
ME11	PURINE NUCLEOBASE BIOSYNTHETIC PROCESS	34	0	0.00212213
ME11	ATP BIOSYNTHETIC PROCESS	175	0	0.00208676
ME11	NEGATIVE REGULATION OF TRANSLATION	183	0	0.00213091
ME11	NUCLEOSOME ASSEMBLY	193	0	0.00214858
ME11	HEME TRANSPORT	22	0.00423729	0.00216252
ME11	PROTEIN GLYCOSYLATION	293	0	0.00245008
ME11	FOLIC ACID-CONTAINING COMPOUND BIOSYNTHETIC PROCESS	21	0	0.00250874
ME11	RNA POLYADENYLATION	101	0	0.00270272
ME11	FOLIC ACID-CONTAINING COMPOUND METABOLIC PROCESS	47	0.00222717	0.00268618
ME11	PROTEIN INSERTION INTO MEMBRANE	31	0.00212766	0.00271569
ME11	METHIONINE BIOSYNTHETIC PROCESS	62	0	0.0027181
ME11	MRNA CATABOLIC PROCESS	399	0	0.00270318
ME11	HISTONE DEACETYLATION	41	0	0.00266511
ME11	TRNA METHYLATION	30	0.00210084	0.0028671
ME11	TETRAPYRROLE BIOSYNTHETIC PROCESS	242	0	0.00334151
ME11	ERGOSTEROL BIOSYNTHETIC PROCESS	32	0.00218818	0.00371988
ME11	TRNA MODIFICATION	117	0	0.00422002
ME11	PROTEIN DEACETYLATION	47	0.00445434	0.00482121
ME11	BRANCHED-CHAIN AMINO ACID BIOSYNTHETIC PROCESS	33	0.00431035	0.00479728
ME11	RIBOFLAVIN BIOSYNTHETIC PROCESS	18	0.00421053	0.00489452
ME11	PROTEIN STABILIZATION	77	0	0.00491154
ME11	CHLOROPHYLL BIOSYNTHETIC PROCESS	164	0	0.00523398
ME11	GLYCINE CATABOLIC PROCESS	45	0.0045045	0.00673397
ME11	PROTEIN REFOLDING	75	0	0.00734317
ME11	PROTEIN PRENYLATION	16	0.00656455	0.00751872
ME11	GLYOXYLATE CYCLE	55	0.00213675	0.00746774
ME11	PROTEIN IMPORT INTO NUCLEUS	239	0	0.00797105
ME11	PYRUVATE METABOLIC PROCESS	94	0	0.00859747
ME11	NUCLEAR-TRANSCRIBED MRNA CATABOLIC PROCESS, NONSENSE-MEDIATED DECAY	123	0	0.00853387
ME11	CTP BIOSYNTHETIC PROCESS	21	0.0104167	0.00870502
ME11	FATTY ACID BIOSYNTHETIC PROCESS	452	0	0.0092036
ME11	TELOMERE MAINTENANCE	172	0	0.010359
ME11	SULFATE TRANSPORT	71	0.00689655	0.0103815
ME11	DNA-TEMPLATED TRANSCRIPTION, TERMINATION	229	0	0.0104059
ME11	TRANSCRIPTION INITIATION FROM RNA POLYMERASE II PROMOTER	167	0	0.0122281
ME11	PROTON TRANSPORT	257	0	0.0121142
ME11	UBIQUINONE BIOSYNTHETIC PROCESS	19	0.0149573	0.0122393
ME11	GENE SILENCING BY RNA	196	0	0.0126175
ME11	PURINE NUCLEOBASE METABOLIC PROCESS	60	0.00235849	0.0130964
ME11	GDP-MANNOSE METABOLIC PROCESS	16	0.0224215	0.0136429
ME11	DOUBLE-STRAND BREAK REPAIR VIA NONHOMOLOGOUS END JOINING	15	0.0151515	0.0144952
ME11	AROMATIC AMINO ACID FAMILY BIOSYNTHETIC PROCESS	119	0	0.0157399
ME11	POLY(A)+ MRNA EXPORT FROM NUCLEUS	39	0.00884956	0.0193374
ME11	REMOVAL OF SUPEROXIDE RADICALS	16	0.012931	0.0208374
ME11	RESPIRATORY CHAIN COMPLEX IV ASSEMBLY	31	0.0263158	0.0208986
ME11	GLUTAMINE METABOLIC PROCESS	61	0.00428265	0.0270594
ME11	ATP HYDROLYSIS COUPLED PROTON TRANSPORT	126	0.00493827	0.0278208
ME11	RNA-DEPENDENT DNA REPLICATION	20	0.0223714	0.0277204
ME11	PROTEIN METHYLATION	387	0	0.0287778
ME11	ATP CATABOLIC PROCESS	410	0	0.0287736
ME11	GLYCEROL METABOLIC PROCESS	43	0.0163551	0.0285809
ME11	L-SERINE METABOLIC PROCESS	66	0.0159453	0.0291214
ME11	REGULATION OF TRANSLATIONAL INITIATION	99	0.00468384	0.0298562
ME11	ELECTRON TRANSPORT CHAIN	422	0	0.0307002
ME11	STEROL METABOLIC PROCESS	210	0.0025	0.0308459
ME11	ARGININE METABOLIC PROCESS	30	0.027957	0.0305753
ME11	DNA-TEMPLATED TRANSCRIPTION, INITIATION	263	0	0.0340642
ME11	EXTRACELLULAR POLYSACCHARIDE BIOSYNTHETIC PROCESS	89	0.0131004	0.0375425
ME11	IRON ION TRANSPORT	211	0	0.0379798
ME11	NUCLEOTIDE-SUGAR METABOLIC PROCESS	98	0.00230947	0.0378716
ME11	CHROMATIN ASSEMBLY OR DISASSEMBLY	278	0.00241546	0.0386718
ME11	GLYCINE METABOLIC PROCESS	57	0.0175055	0.0410586
ME11	INTRA-GOLGI VESICLE-MEDIATED TRANSPORT	119	0.0130152	0.0417343
ME11	NUCLEOTIDE-SUGAR TRANSPORT	109	0.00451467	0.0426175
ME11	POSITIVE REGULATION OF AUTOPHAGY	18	0.0674847	0.0438204
ME11	CELLULAR ALDEHYDE METABOLIC PROCESS	195	0.00234742	0.0444419
ME11	FATTY-ACYL-COA BIOSYNTHETIC PROCESS	24	0.0424107	0.0455617
ME11	GOLGI ORGANIZATION	32	0.033557	0.0492253
ME12	DNA METHYLATION	85	0	0.000755274
ME12	CHROMATIN REMODELING	209	0	0.000377637
ME12	L-PHENYLALANINE CATABOLIC PROCESS	31	0	0.000251758
ME12	REGULATION OF MERISTEM STRUCTURAL ORGANIZATION	87	0	0.000380058
ME12	AROMATIC AMINO ACID FAMILY METABOLIC PROCESS	172	0	0.000451371
ME12	REGULATION OF CHLOROPHYLL BIOSYNTHETIC PROCESS	80	0	0.000501493
ME12	THIAMINE BIOSYNTHETIC PROCESS	29	0	0.000873693
ME12	CHLOROPHYLL BIOSYNTHETIC PROCESS	164	0	0.000954503
ME12	SPLICEOSOMAL COMPLEX ASSEMBLY	129	0	0.000929296
ME12	PROTEIN-CHROMOPHORE LINKAGE	43	0	0.00137363
ME12	TRYPTOPHAN BIOSYNTHETIC PROCESS	61	0	0.00187434
ME12	ATP-DEPENDENT CHROMATIN REMODELING	66	0	0.00171814
ME12	FLAVONOID BIOSYNTHETIC PROCESS	394	0	0.00158598
ME12	AROMATIC AMINO ACID FAMILY BIOSYNTHETIC PROCESS	119	0	0.00196241
ME12	PHOTOSYNTHESIS, LIGHT HARVESTING	65	0	0.00459705
ME12	NUCLEOSOME ASSEMBLY	193	0	0.00484011
ME12	THYLAKOID MEMBRANE ORGANIZATION	77	0	0.00571551
ME12	PROTEIN-TETRAPYRROLE LINKAGE	16	0.00328947	0.00581458
ME12	ARGININE METABOLIC PROCESS	30	0.00333333	0.00627814
ME12	TYROSINE METABOLIC PROCESS	34	0.00157233	0.00645592
ME12	RESPONSE TO FREEZING	127	0	0.00788618
ME12	PEPTIDYL-HISTIDINE PHOSPHORYLATION	20	0.00504202	0.00769983
ME12	THIAMINE METABOLIC PROCESS	35	0.0015674	0.00843124
ME12	GENE SILENCING BY RNA	196	0	0.00811101
ME12	PROLINE BIOSYNTHETIC PROCESS	42	0.00477707	0.0118951
ME12	PHOTOSYNTHESIS, LIGHT REACTION	259	0	0.0138266
ME12	POLYSACCHARIDE CATABOLIC PROCESS	324	0	0.0155399
ME12	TRYPTOPHAN METABOLIC PROCESS	81	0.00151057	0.0162274
ME12	LIGNIN CATABOLIC PROCESS	19	0.0196399	0.022946
ME12	RESPONSE TO ALUMINUM ION	40	0.00650406	0.0259245
ME12	CHROMATIN ASSEMBLY OR DISASSEMBLY	278	0	0.0260379
ME12	PHOSPHORELAY SIGNAL TRANSDUCTION SYSTEM	456	0	0.0482461
ME12	CHORISMATE METABOLIC PROCESS	15	0.0318584	0.0489253
ME13	RIBOSOME ASSEMBLY	184	0	0
ME13	REGULATION OF TRANSLATIONAL FIDELITY	66	0	0
ME13	NUCLEOSOME ASSEMBLY	193	0	0
ME13	RRNA MODIFICATION	45	0	0
ME13	TUBULIN COMPLEX ASSEMBLY	41	0	0
ME13	RNA METHYLATION	60	0	0
ME13	RRNA METHYLATION	20	0	0
ME13	TELOMERE MAINTENANCE	172	0	0
ME13	TRNA AMINOACYLATION	139	0	0
ME13	TRNA AMINOACYLATION FOR PROTEIN TRANSLATION	139	0	0
ME13	PSEUDOURIDINE SYNTHESIS	45	0	0
ME13	CHLOROPHYLL BIOSYNTHETIC PROCESS	164	0	0
ME13	PROTEIN IMPORT INTO MITOCHONDRIAL INNER MEMBRANE	19	0	7.28922e-05
ME13	GTP BIOSYNTHETIC PROCESS	17	0	6.76856e-05
ME13	CARBON FIXATION	60	0	6.31732e-05
ME13	CHROMATIN ASSEMBLY OR DISASSEMBLY	278	0	0.000373365
ME13	PORPHYRIN-CONTAINING COMPOUND BIOSYNTHETIC PROCESS	222	0	0.000351403
ME13	TRNA PROCESSING	287	0	0.000721084
ME13	DNA-DEPENDENT DNA REPLICATION	238	0	0.000733893
ME13	DNA REPLICATION INITIATION	54	0	0.00095682
ME13	REGULATION OF DNA REPLICATION	172	0	0.00100332
ME13	TRNA METHYLATION	30	0	0.00104844
ME13	PTERIDINE-CONTAINING COMPOUND METABOLIC PROCESS	53	0	0.00118025
ME13	FERROUS IRON TRANSPORT	48	0	0.00113107
ME13	TETRAPYRROLE BIOSYNTHETIC PROCESS	242	0	0.00112407
ME13	GLYCEROL-3-PHOSPHATE METABOLIC PROCESS	16	0.00176991	0.00131642
ME13	POSITIVE REGULATION OF TRANSLATIONAL ELONGATION	29	0	0.00175303
ME13	GENE SILENCING BY RNA	196	0	0.00211798
ME13	ATP-DEPENDENT CHROMATIN REMODELING	66	0	0.00211672
ME13	FOLIC ACID-CONTAINING COMPOUND METABOLIC PROCESS	47	0.00171233	0.00360667
ME13	DNA REPLICATION	472	0	0.00359103
ME13	TRNA MODIFICATION	117	0	0.00385656
ME13	ARGININE METABOLIC PROCESS	30	0.00344828	0.00383222
ME13	ERGOSTEROL BIOSYNTHETIC PROCESS	32	0	0.00534289
ME13	DOUBLE-STRAND BREAK REPAIR VIA NONHOMOLOGOUS END JOINING	15	0.00364964	0.00715964
ME13	CTP BIOSYNTHETIC PROCESS	21	0.00359712	0.00774015
ME13	AROMATIC AMINO ACID FAMILY METABOLIC PROCESS	172	0	0.00785524
ME13	REGULATION OF CHLOROPHYLL BIOSYNTHETIC PROCESS	80	0	0.00911028
ME13	TRANSLATIONAL INITIATION	290	0	0.00903233
ME13	FUMARATE METABOLIC PROCESS	16	0.00537634	0.00910399
ME13	CAROTENOID BIOSYNTHETIC PROCESS	100	0	0.00935053
ME13	GLUCONEOGENESIS	100	0.0016129	0.00936833
ME13	DNA-TEMPLATED TRANSCRIPTION, TERMINATION	229	0	0.0112204
ME13	AROMATIC AMINO ACID FAMILY BIOSYNTHETIC PROCESS	119	0	0.0114493
ME13	SPLICEOSOMAL COMPLEX ASSEMBLY	129	0	0.0114201
ME13	NEGATIVE REGULATION OF TRANSLATION	183	0	0.0133259
ME13	GLUCOSE CATABOLIC PROCESS	297	0	0.0135014
ME13	RNA-DEPENDENT DNA REPLICATION	20	0.0142857	0.0135158
ME13	LYSINE BIOSYNTHETIC PROCESS VIA DIAMINOPIMELATE	25	0.0140598	0.0136527
ME13	HISTONE DEACETYLATION	41	0.00338409	0.0135374
ME13	DOUBLE-STRAND BREAK REPAIR VIA HOMOLOGOUS RECOMBINATION	114	0.00489396	0.0143808
ME13	RNA 3'-END PROCESSING	383	0	0.0162767
ME13	THYLAKOID MEMBRANE ORGANIZATION	77	0.00157978	0.0167441
ME13	GLYCOLYSIS	204	0	0.0165476
ME13	REMOVAL OF SUPEROXIDE RADICALS	16	0.0200364	0.0166527
ME13	TRICARBOXYLIC ACID CYCLE	100	0.00163934	0.0182574
ME13	DOUBLE-STRAND BREAK REPAIR	230	0	0.0195274
ME13	FOLIC ACID-CONTAINING COMPOUND BIOSYNTHETIC PROCESS	21	0.0216998	0.0253015
ME13	COFACTOR BIOSYNTHETIC PROCESS	469	0	0.0252663
ME13	ANAPHASE-PROMOTING COMPLEX-DEPENDENT PROTEASOMAL UBIQUITIN-DEPENDENT PROTEIN CATABOLIC PROCESS	284	0	0.0254687
ME13	ACYL-COA METABOLIC PROCESS	149	0	0.0285715
ME13	PURINE NUCLEOBASE BIOSYNTHETIC PROCESS	34	0.015	0.0282091
ME13	PROTEIN METHYLATION	387	0	0.0290206
ME13	PENTOSE-PHOSPHATE SHUNT	102	0.00321027	0.0288329
ME13	NUCLEOTIDE PHOSPHORYLATION	17	0.0285205	0.0300291
ME13	CHROMATIN REMODELING	209	0	0.0300674
ME13	PROTEIN N-LINKED GLYCOSYLATION	148	0.00447761	0.0299011
ME13	METHIONINE BIOSYNTHETIC PROCESS	62	0.0116473	0.0298799
ME13	PROTEIN DEACETYLATION	47	0.00863558	0.0306224
ME13	PYRIMIDINE NUCLEOTIDE BIOSYNTHETIC PROCESS	64	0.0134228	0.0349285
ME13	DNA-TEMPLATED TRANSCRIPTION, INITIATION	263	0	0.0351573
ME13	DNA RECOMBINATION	442	0	0.0386592
ME13	FATTY-ACYL-COA BIOSYNTHETIC PROCESS	24	0.0338078	0.0435437
ME13	GLUTAMINE METABOLIC PROCESS	61	0.0153846	0.0468712
ME13	POLY(A)+ MRNA EXPORT FROM NUCLEUS	39	0.0157895	0.0471168
ME13	CELL CYCLE ARREST	347	0	0.0474129
ME13	CHORISMATE METABOLIC PROCESS	15	0.0482143	0.0473142
ME13	7-METHYLGUANOSINE RNA CAPPING	73	0.0135135	0.048825
ME13	PURINE NUCLEOBASE METABOLIC PROCESS	60	0.0257732	0.0484339
ME14	PHOSPHATIDYLCHOLINE METABOLIC PROCESS	57	0.00161551	0.00892155
ME14	L-METHIONINE SALVAGE FROM METHYLTHIOADENOSINE	15	0	0.036704
ME15	VACUOLAR TRANSPORT	320	0	0
ME15	RETROGRADE TRANSPORT, ENDOSOME TO GOLGI	74	0	0.000503165
ME15	VESICLE FUSION WITH GOLGI APPARATUS	51	0	0.00104214
ME15	AUTOPHAGIC VACUOLE ASSEMBLY	45	0	0.00157557
ME15	INTRA-GOLGI VESICLE-MEDIATED TRANSPORT	119	0	0.00228362
ME15	ER TO GOLGI VESICLE-MEDIATED TRANSPORT	299	0	0.0067106
ME15	VESICLE DOCKING	52	0	0.0247341
ME15	REGULATION OF PH	80	0	0.026279
ME15	L-METHIONINE SALVAGE FROM METHYLTHIOADENOSINE	15	0.00632911	0.0324153
ME15	PHOSPHATIDYLCHOLINE METABOLIC PROCESS	57	0.0021978	0.0448091
ME15	VESICLE DOCKING INVOLVED IN EXOCYTOSIS	42	0.00668151	0.0422565
ME15	RETROGRADE VESICLE-MEDIATED TRANSPORT, GOLGI TO ER	130	0	0.0472765
ME15	FATTY ACID BETA-OXIDATION	104	0.0023753	0.0470128
ME16	RESPIRATORY ELECTRON TRANSPORT CHAIN	158	0	0
ME16	REGULATION OF TRANSLATIONAL FIDELITY	66	0	0
ME16	RIBOSOME ASSEMBLY	184	0	0
ME16	ATP SYNTHESIS COUPLED PROTON TRANSPORT	114	0	0
ME16	ATP SYNTHESIS COUPLED ELECTRON TRANSPORT	98	0	0
ME16	PROTEIN N-LINKED GLYCOSYLATION	148	0	0
ME16	PROTEIN N-LINKED GLYCOSYLATION VIA ASPARAGINE	100	0	0
ME16	MITOCHONDRIAL ELECTRON TRANSPORT, UBIQUINOL TO CYTOCHROME C	28	0	0
ME16	ANAPHASE-PROMOTING COMPLEX-DEPENDENT PROTEASOMAL UBIQUITIN-DEPENDENT PROTEIN CATABOLIC PROCESS	284	0	0
ME16	TUBULIN COMPLEX ASSEMBLY	41	0	0
ME16	TRANSLATIONAL INITIATION	290	0	0
ME16	ATP HYDROLYSIS COUPLED PROTON TRANSPORT	126	0	0
ME16	TRICARBOXYLIC ACID CYCLE	100	0	0
ME16	MITOCHONDRIAL ELECTRON TRANSPORT, NADH TO UBIQUINONE	43	0	0
ME16	PROTEIN IMPORT INTO MITOCHONDRIAL INNER MEMBRANE	19	0	0
ME16	GLUCONEOGENESIS	100	0	0
ME16	TRNA AMINOACYLATION	139	0	0
ME16	TRNA AMINOACYLATION FOR PROTEIN TRANSLATION	139	0	0
ME16	RETROGRADE TRANSPORT, ENDOSOME TO GOLGI	74	0	0
ME16	ATP BIOSYNTHETIC PROCESS	175	0	0
ME16	RESPIRATORY CHAIN COMPLEX IV ASSEMBLY	31	0	9.25427e-05
ME16	RETROGRADE VESICLE-MEDIATED TRANSPORT, GOLGI TO ER	130	0	8.83362e-05
ME16	GTP BIOSYNTHETIC PROCESS	17	0	8.44955e-05
ME16	AEROBIC RESPIRATION	224	0	8.09748e-05
ME16	PROTON TRANSPORT	257	0	7.77359e-05
ME16	PURINE RIBONUCLEOTIDE BIOSYNTHETIC PROCESS	271	0	0.000149492
ME16	PURINE RIBONUCLEOSIDE MONOPHOSPHATE BIOSYNTHETIC PROCESS	209	0	0.000213952
ME16	PROTEIN GLYCOSYLATION	293	0	0.000206311
ME16	PURINE NUCLEOTIDE BIOSYNTHETIC PROCESS	281	0	0.000273191
ME16	POSITIVE REGULATION OF AUTOPHAGY	18	0	0.000330751
ME16	VACUOLAR TRANSPORT	320	0	0.000448518
ME16	GLYCOLYSIS	204	0	0.000434501
ME16	ELECTRON TRANSPORT CHAIN	422	0	0.000421335
ME16	INTRA-GOLGI VESICLE-MEDIATED TRANSPORT	119	0	0.000517204
ME16	MITOCHONDRIAL TRANSPORT	217	0	0.000928367
ME16	CARBON FIXATION	60	0	0.000902579
ME16	MALATE METABOLIC PROCESS	35	0	0.000933309
ME16	GLUCOSE CATABOLIC PROCESS	297	0	0.00105756
ME16	ACYL-COA METABOLIC PROCESS	149	0	0.00141521
ME16	VESICLE DOCKING	52	0.0027248	0.00157875
ME16	RIBONUCLEOSIDE MONOPHOSPHATE BIOSYNTHETIC PROCESS	243	0	0.00187877
ME16	FUMARATE METABOLIC PROCESS	16	0	0.00206298
ME16	GLYCEROL METABOLIC PROCESS	43	0	0.00205895
ME16	RRNA METHYLATION	20	0	0.0023609
ME16	CYTOCHROME COMPLEX ASSEMBLY	41	0	0.00257102
ME16	PENTOSE-PHOSPHATE SHUNT	102	0	0.00251513
ME16	GDP-MANNOSE METABOLIC PROCESS	16	0	0.00254069
ME16	NUCLEOTIDE BIOSYNTHETIC PROCESS	456	0	0.00265587
ME16	RESPIRATORY GASEOUS EXCHANGE	29	0.005291	0.0026788
ME16	TRANSCRIPTION INITIATION FROM RNA POLYMERASE II PROMOTER	167	0	0.00310561
ME16	PROTEIN IMPORT INTO NUCLEUS	239	0	0.00311917
ME16	FATTY ACID BIOSYNTHETIC PROCESS	452	0	0.0031326
ME16	PROTEIN TARGETING TO MITOCHONDRION	134	0	0.00318343
ME16	PROTEIN IMPORT	377	0	0.00337118
ME16	LIPOATE BIOSYNTHETIC PROCESS	23	0.00797872	0.00392865
ME16	REGULATION OF PH	80	0	0.00393104
ME16	PEROXISOME FISSION	28	0	0.00434215
ME16	RIBOFLAVIN BIOSYNTHETIC PROCESS	18	0.0078125	0.0051255
ME16	CELL CYCLE ARREST	347	0	0.00543473
ME16	PROTEIN POLYMERIZATION	246	0	0.00534415
ME16	NEGATIVE REGULATION OF TRANSLATION	183	0	0.00641111
ME16	CELLULAR IRON ION HOMEOSTASIS	137	0	0.00677556
ME16	ERGOSTEROL BIOSYNTHETIC PROCESS	32	0.008	0.00700436
ME16	SRP-DEPENDENT COTRANSLATIONAL PROTEIN TARGETING TO MEMBRANE	20	0.0100756	0.0070512
ME16	RNA METHYLATION	60	0.00578035	0.00725968
ME16	NUCLEOTIDE-SUGAR TRANSPORT	109	0	0.00832559
ME16	POSITIVE REGULATION OF TRANSLATIONAL ELONGATION	29	0.00252525	0.00828907
ME16	VESICLE DOCKING INVOLVED IN EXOCYTOSIS	42	0.0027027	0.00824864
ME16	VESICLE FUSION WITH GOLGI APPARATUS	51	0	0.00917647
ME16	GLUCOSE METABOLIC PROCESS	452	0	0.00926944
ME16	NUCLEOTIDE PHOSPHORYLATION	17	0.0150376	0.010721
ME16	GPI ANCHOR BIOSYNTHETIC PROCESS	49	0.00271003	0.0110441
ME16	HISTIDINE BIOSYNTHETIC PROCESS	28	0.00246305	0.012581
ME16	ER TO GOLGI VESICLE-MEDIATED TRANSPORT	299	0	0.0124878
ME16	PROTEIN PRENYLATION	16	0.0146699	0.0136076
ME16	CLATHRIN COAT ASSEMBLY	18	0.00737101	0.0139552
ME16	ISOCITRATE METABOLIC PROCESS	19	0.0127877	0.0143529
ME16	NUCLEOTIDE-SUGAR METABOLIC PROCESS	98	0.00319489	0.0144627
ME16	PENTOSE-PHOSPHATE SHUNT, NON-OXIDATIVE BRANCH	16	0.0246305	0.0143027
ME16	METHIONINE METABOLIC PROCESS	66	0.00584795	0.0165943
ME16	UBIQUINONE BIOSYNTHETIC PROCESS	19	0.0165289	0.0180749
ME16	PROTEIN IMPORT INTO MITOCHONDRIAL OUTER MEMBRANE	28	0.0163934	0.021959
ME16	IRON ION TRANSPORT	211	0	0.0236598
ME16	SUPEROXIDE METABOLIC PROCESS	49	0.00882353	0.0236147
ME16	TRANSCRIPTION FROM RNA POLYMERASE III PROMOTER	101	0.0037037	0.0236239
ME16	PHAGOCYTOSIS	90	0	0.025218
ME16	ONE-CARBON METABOLIC PROCESS	58	0	0.0249945
ME16	GLYOXYLATE CYCLE	55	0.0122324	0.0251455
ME16	GPI ANCHOR METABOLIC PROCESS	70	0.00561798	0.0280477
ME16	PROTEIN RETENTION IN ER LUMEN	51	0.0144509	0.0277565
ME16	ACTIN FILAMENT POLYMERIZATION	83	0.0035461	0.0279498
ME16	RNA 3'-END PROCESSING	383	0	0.0281981
ME16	EXOCYTOSIS	214	0	0.0290137
ME16	SIGNAL PEPTIDE PROCESSING	28	0.0125	0.0291965
ME16	7-METHYLGUANOSINE MRNA CAPPING	65	0.0030303	0.0289728
ME16	CTP BIOSYNTHETIC PROCESS	21	0.0320856	0.0299977
ME16	PROTEIN SECRETION	27	0.0103093	0.0313735
ME16	PHOSPHOLIPID BIOSYNTHETIC PROCESS	318	0	0.0323703
ME16	G-PROTEIN COUPLED RECEPTOR SIGNALING PATHWAY	143	0.0034965	0.0320433
ME16	COFACTOR BIOSYNTHETIC PROCESS	469	0	0.0325326
ME16	METHIONINE BIOSYNTHETIC PROCESS	62	0.015015	0.0355196
ME16	LYSINE BIOSYNTHETIC PROCESS VIA DIAMINOPIMELATE	25	0.0350877	0.0354539
ME16	PROTEIN NEDDYLATION	24	0.0493507	0.0355487
ME16	RRNA MODIFICATION	45	0.0141243	0.0358804
ME16	GLYCEROL ETHER METABOLIC PROCESS	32	0.0268657	0.0362818
ME16	AMINE METABOLIC PROCESS	448	0	0.0367417
ME16	HEME TRANSPORT	22	0.0388601	0.0412953
ME16	7-METHYLGUANOSINE RNA CAPPING	73	0.0121951	0.0415385
ME16	BRANCHED-CHAIN AMINO ACID METABOLIC PROCESS	76	0.0185759	0.0432973
ME16	PROTEIN INSERTION INTO MEMBRANE	31	0.0449735	0.0439849
ME16	SPHINGOLIPID METABOLIC PROCESS	160	0.0078125	0.0449393
ME17	REGULATION OF MERISTEM STRUCTURAL ORGANIZATION	87	0	0
ME17	ATP-DEPENDENT CHROMATIN REMODELING	66	0	0.0019576
ME17	DNA METHYLATION	85	0	0.00278388
ME17	POLYSACCHARIDE CATABOLIC PROCESS	324	0	0.0220446
ME17	CHROMATIN REMODELING	209	0	0.018762
ME17	CYTOKININ METABOLIC PROCESS	68	0	0.0250887
ME17	WATER TRANSPORT	76	0	0.0229416
ME17	OLIGOSACCHARIDE BIOSYNTHETIC PROCESS	186	0	0.0225314
ME17	FLAVONOID BIOSYNTHETIC PROCESS	394	0	0.0224586
ME17	RECOGNITION OF POLLEN	71	0	0.0206597
ME17	SPLICEOSOMAL COMPLEX ASSEMBLY	129	0	0.0372583
ME17	THIAMINE BIOSYNTHETIC PROCESS	29	0.00292826	0.0385367
ME17	REGULATION OF DNA REPLICATION	172	0	0.0389486
ME17	GLUTATHIONE BIOSYNTHETIC PROCESS	19	0.00888889	0.0396905
ME17	NUCLEOSOME ASSEMBLY	193	0.00115875	0.0426267
ME17	GENE SILENCING BY RNA	196	0	0.040104
ME17	SUCROSE BIOSYNTHETIC PROCESS	68	0.00501253	0.0402291
ME17	PHOTOSYNTHESIS, LIGHT HARVESTING	65	0.00394218	0.0430172
ME17	PATHOGENESIS	19	0.0227964	0.0409575
ME17	DNA REPLICATION	472	0	0.046839
ME18	NUCLEOSOME ASSEMBLY	193	0	0
ME18	TELOMERE MAINTENANCE	172	0	0
ME18	DNA-DEPENDENT DNA REPLICATION	238	0	0
ME18	CHROMATIN ASSEMBLY OR DISASSEMBLY	278	0	0
ME18	DNA REPLICATION INITIATION	54	0	0
ME18	DOUBLE-STRAND BREAK REPAIR VIA HOMOLOGOUS RECOMBINATION	114	0	0
ME18	PHOSPHATIDYLINOSITOL-MEDIATED SIGNALING	82	0	0
ME18	REGULATION OF DNA REPLICATION	172	0	0
ME18	DNA REPLICATION	472	0	0
ME18	ATP-DEPENDENT CHROMATIN REMODELING	66	0	6.90909e-05
ME18	REGULATION OF TRANSLATIONAL FIDELITY	66	0	0.000129243
ME18	DOUBLE-STRAND BREAK REPAIR	230	0	0.000237102
ME18	RRNA MODIFICATION	45	0	0.000218863
ME18	DOUBLE-STRAND BREAK REPAIR VIA NONHOMOLOGOUS END JOINING	15	0	0.00020323
ME18	CHLOROPHYLL BIOSYNTHETIC PROCESS	164	0	0.000949376
ME18	RRNA METHYLATION	20	0.0015361	0.00102626
ME18	RNA METHYLATION	60	0	0.0010503
ME18	PROTEIN-CHROMOPHORE LINKAGE	43	0	0.00103318
ME18	REGULATION OF CYCLIN-DEPENDENT PROTEIN SERINE/THREONINE KINASE ACTIVITY	77	0	0.00105516
ME18	PHOTOSYNTHESIS, LIGHT HARVESTING	65	0	0.00146651
ME18	RNA-DEPENDENT DNA REPLICATION	20	0	0.00204567
ME18	SOS RESPONSE	15	0.00157233	0.00282059
ME18	MICROTUBULE-BASED MOVEMENT	275	0	0.00465164
ME18	GTP BIOSYNTHETIC PROCESS	17	0.003003	0.00611516
ME18	REGULATION OF MITOTIC METAPHASE/ANAPHASE TRANSITION	103	0	0.00626778
ME18	ERGOSTEROL BIOSYNTHETIC PROCESS	32	0.00144928	0.00811115
ME18	MISMATCH REPAIR	39	0	0.00999588
ME18	DNA RECOMBINATION	442	0	0.0116147
ME18	CHROMATIN REMODELING	209	0	0.0114871
ME18	PORPHYRIN-CONTAINING COMPOUND BIOSYNTHETIC PROCESS	222	0	0.0114328
ME18	ARGININE METABOLIC PROCESS	30	0.00440529	0.0125098
ME18	RIBOSOME ASSEMBLY	184	0	0.013071
ME18	GENE SILENCING BY RNA	196	0	0.0139914
ME18	MICROTUBULE NUCLEATION	28	0.0104012	0.0155843
ME18	CTP BIOSYNTHETIC PROCESS	21	0.0173502	0.0163761
ME18	DNA-TEMPLATED TRANSCRIPTION, INITIATION	263	0	0.0184587
ME18	PENTOSE-PHOSPHATE SHUNT, NON-OXIDATIVE BRANCH	16	0.0232919	0.0187994
ME18	RECIPROCAL MEIOTIC RECOMBINATION	92	0.00127714	0.0194864
ME18	TETRAPYRROLE BIOSYNTHETIC PROCESS	242	0	0.0224342
ME18	PROTEIN IMPORT INTO MITOCHONDRIAL INNER MEMBRANE	19	0.015456	0.0232625
ME18	TUBULIN COMPLEX ASSEMBLY	41	0.0144718	0.0239442
ME18	SPLICEOSOMAL COMPLEX ASSEMBLY	129	0.00372671	0.032766
ME18	ASPARAGINE BIOSYNTHETIC PROCESS	20	0.0284858	0.0343323
ME18	PATHOGENESIS	19	0.025	0.0371389
ME18	FLAVONOID BIOSYNTHETIC PROCESS	394	0	0.0494472
ME18	1-AMINOCYCLOPROPANE-1-CARBOXYLATE BIOSYNTHETIC PROCESS	24	0.0210526	0.0488963
ME18	SULFATE TRANSPORT	71	0.00684931	0.0479174
ME19	TRNA AMINOACYLATION	139	0	0
ME19	TRNA AMINOACYLATION FOR PROTEIN TRANSLATION	139	0	0
ME19	PSEUDOURIDINE SYNTHESIS	45	0	0
ME19	FERROUS IRON TRANSPORT	48	0	0
ME19	TUBULIN COMPLEX ASSEMBLY	41	0	0
ME19	TRNA PROCESSING	287	0	0
ME19	RRNA MODIFICATION	45	0	0
ME19	RNA METHYLATION	60	0	0.000138601
ME19	REGULATION OF DNA REPLICATION	172	0	0.00036653
ME19	PROTEIN IMPORT INTO MITOCHONDRIAL INNER MEMBRANE	19	0	0.000444315
ME19	DNA METHYLATION	85	0	0.000403923
ME19	ATP-DEPENDENT CHROMATIN REMODELING	66	0	0.000560519
ME19	GENE SILENCING BY RNA	196	0	0.000689175
ME19	DNA REPLICATION	472	0	0.000883909
ME19	RNA 3'-END PROCESSING	383	0	0.000824982
ME19	TRNA METHYLATION	30	0	0.00275714
ME19	PYRIMIDINE NUCLEOTIDE BIOSYNTHETIC PROCESS	64	0	0.003199
ME19	TRNA MODIFICATION	117	0	0.0032087
ME19	PROTEIN METHYLATION	387	0	0.00351246
ME19	MRNA CATABOLIC PROCESS	399	0	0.00394342
ME19	CHROMATIN REMODELING	209	0	0.00375563
ME19	RNA-DEPENDENT DNA REPLICATION	20	0	0.00378246
ME19	PROTEIN DEACETYLATION	47	0	0.00420159
ME19	HISTONE DEACETYLATION	41	0	0.004166
ME19	G2/M TRANSITION OF MITOTIC CELL CYCLE	202	0	0.00427373
ME19	RRNA METHYLATION	20	0	0.00440789
ME19	PROTEIN TARGETING TO MITOCHONDRION	134	0	0.00513198
ME19	DOUBLE-STRAND BREAK REPAIR VIA NONHOMOLOGOUS END JOINING	15	0.00391389	0.00522394
ME19	RRNA CATABOLIC PROCESS	33	0	0.00741194
ME19	PROTEIN STABILIZATION	77	0	0.00881385
ME19	PROTEIN N-LINKED GLYCOSYLATION VIA ASPARAGINE	100	0	0.00936354
ME19	DNA-TEMPLATED TRANSCRIPTION, INITIATION	263	0	0.0100585
ME19	TRANSCRIPTION FROM RNA POLYMERASE III PROMOTER	101	0	0.0104183
ME19	DNA-TEMPLATED TRANSCRIPTION, ELONGATION	258	0	0.0101119
ME19	GOLGI ORGANIZATION	32	0.003861	0.0104437
ME19	SULFATE TRANSPORT	71	0.00369004	0.0104585
ME19	GENE SILENCING	454	0	0.0102063
ME19	PROTEIN IMPORT INTO MITOCHONDRIAL OUTER MEMBRANE	28	0.00566038	0.010239
ME19	DNA-TEMPLATED TRANSCRIPTION, TERMINATION	229	0	0.0107105
ME19	GTP BIOSYNTHETIC PROCESS	17	0.00954198	0.0108327
ME19	DNA RECOMBINATION	442	0	0.010731
ME19	PROTEIN INSERTION INTO MEMBRANE	31	0.00587084	0.0114671
ME19	GLYCEROL-3-PHOSPHATE METABOLIC PROCESS	16	0.00749064	0.0120183
ME19	SPLICEOSOMAL COMPLEX ASSEMBLY	129	0.00179856	0.0122023
ME19	DNA TOPOLOGICAL CHANGE	25	0.0095057	0.0135151
ME19	BASE-EXCISION REPAIR	73	0	0.0140948
ME19	PROTEIN REFOLDING	75	0	0.0142512
ME19	REGULATION OF TRANSLATIONAL FIDELITY	66	0.00192308	0.0143754
ME19	PROTEIN N-LINKED GLYCOSYLATION	148	0	0.0141047
ME19	UMP BIOSYNTHETIC PROCESS	28	0.00540541	0.0152079
ME19	DNA-DEPENDENT DNA REPLICATION	238	0	0.0158344
ME19	PROTEIN SECRETION	27	0.0056926	0.0155743
ME19	MISMATCH REPAIR	39	0.00589391	0.0157527
ME19	REGULATION OF BARRIER SEPTUM ASSEMBLY	66	0.00188679	0.0171058
ME19	MRNA CLEAVAGE	68	0.00380228	0.0178799
ME19	REGULATION OF RAB GTPASE ACTIVITY	59	0.00379507	0.0243012
ME19	TRNA 3'-TRAILER CLEAVAGE	16	0.0271318	0.0264612
ME19	LYSINE BIOSYNTHETIC PROCESS VIA DIAMINOPIMELATE	25	0.0154143	0.026845
ME19	RNA POLYADENYLATION	101	0.00915751	0.02639
ME19	ARGININE METABOLIC PROCESS	30	0.00372439	0.0261927
ME19	HISTIDINE BIOSYNTHETIC PROCESS	28	0.0177866	0.0288347
ME19	PROTEIN PRENYLATION	16	0.0294695	0.0326403
ME19	MAINTENANCE OF FIDELITY INVOLVED IN DNA-DEPENDENT DNA REPLICATION	30	0.0275735	0.0339072
ME19	POLY(A)+ MRNA EXPORT FROM NUCLEUS	39	0.0149533	0.0354771
ME19	TRANSCRIPTION INITIATION FROM RNA POLYMERASE II PROMOTER	167	0	0.0354863
ME19	RECIPROCAL MEIOTIC RECOMBINATION	92	0.00902527	0.0363925
ME19	REGULATION OF DNA-TEMPLATED TRANSCRIPTION, ELONGATION	40	0.0242991	0.0361976
ME19	HISTONE LYSINE METHYLATION	257	0	0.0415141
ME19	NUCLEOTIDE-EXCISION REPAIR	187	0.00169492	0.0501499
ME19	CTP BIOSYNTHETIC PROCESS	21	0.0329457	0.0495311
ME21	RNA METHYLATION	60	0	0
ME21	RRNA MODIFICATION	45	0	0
ME21	TRNA METHYLATION	30	0	0
ME21	PSEUDOURIDINE SYNTHESIS	45	0	0.000217662
ME21	REGULATION OF DNA REPLICATION	172	0	0.000174129
ME21	TRNA AMINOACYLATION FOR PROTEIN TRANSLATION	139	0	0.000301918
ME21	TRNA AMINOACYLATION	139	0	0.000258787
ME21	RRNA METHYLATION	20	0	0.000467487
ME21	TRNA PROCESSING	287	0	0.000514247
ME21	DNA REPLICATION	472	0	0.000643254
ME21	DNA-TEMPLATED TRANSCRIPTION, INITIATION	263	0	0.00225023
ME21	PROTEIN IMPORT INTO MITOCHONDRIAL INNER MEMBRANE	19	0.00190114	0.00215109
ME21	TUBULIN COMPLEX ASSEMBLY	41	0	0.00198563
ME21	FERROUS IRON TRANSPORT	48	0	0.00281086
ME21	MISMATCH REPAIR	39	0	0.00511079
ME21	ATP-DEPENDENT CHROMATIN REMODELING	66	0	0.0055726
ME21	7-METHYLGUANOSINE RNA CAPPING	73	0	0.00706178
ME21	REGULATION OF CYCLIN-DEPENDENT PROTEIN SERINE/THREONINE KINASE ACTIVITY	77	0	0.00717883
ME21	PROTEIN INSERTION INTO MEMBRANE	31	0.0037037	0.00908283
ME21	GTP BIOSYNTHETIC PROCESS	17	0.00185185	0.00862869
ME21	TRNA MODIFICATION	117	0	0.00887289
ME21	CTP BIOSYNTHETIC PROCESS	21	0.00191571	0.0102052
ME21	GENE SILENCING BY RNA	196	0	0.0132445
ME21	HISTONE DEACETYLATION	41	0.00180832	0.0129136
ME21	PHYTOCHELATIN BIOSYNTHETIC PROCESS	25	0.00188324	0.0127194
ME21	TELOMERE MAINTENANCE	172	0	0.0130637
ME21	REGULATION OF TRANSLATIONAL FIDELITY	66	0	0.0127752
ME21	TRANSCRIPTION INITIATION FROM RNA POLYMERASE II PROMOTER	167	0	0.0124803
ME21	DNA-DEPENDENT DNA REPLICATION	238	0	0.0122664
ME21	PYRIMIDINE NUCLEOTIDE BIOSYNTHETIC PROCESS	64	0.0018622	0.0129785
ME21	DOUBLE-STRAND BREAK REPAIR VIA NONHOMOLOGOUS END JOINING	15	0.0183824	0.013198
ME21	PROTEIN DEACETYLATION	47	0.00178571	0.0135121
ME21	SULFATE TRANSPORT	71	0.00184502	0.0134023
ME21	RNA-DEPENDENT DNA REPLICATION	20	0.00776699	0.0149329
ME21	GLYCEROL-3-PHOSPHATE METABOLIC PROCESS	16	0.00948767	0.0160445
ME21	DNA METHYLATION	85	0.00178571	0.0198567
ME21	7-METHYLGUANOSINE MRNA CAPPING	65	0.00184162	0.0200737
ME21	DNA RECOMBINATION	442	0	0.0195952
ME21	TRANSCRIPTION FROM RNA POLYMERASE III PROMOTER	101	0.00181488	0.023034
ME21	NUCLEOTIDE-EXCISION REPAIR	187	0	0.0291171
ME21	RNA 3'-END PROCESSING	383	0	0.0289496
ME21	DNA TOPOLOGICAL CHANGE	25	0.0260223	0.0296022
ME21	ARGININE METABOLIC PROCESS	30	0.0165746	0.0405024
ME21	PROTEIN METHYLATION	387	0	0.0402408
ME21	G2/M TRANSITION OF MITOTIC CELL CYCLE	202	0.0017094	0.0433197
ME21	RECIPROCAL MEIOTIC RECOMBINATION	92	0.00524476	0.0447274
ME21	RRNA CATABOLIC PROCESS	33	0.0360531	0.0477052
ME21	MRNA CATABOLIC PROCESS	399	0	0.0476956
ME21	GOLGI ORGANIZATION	32	0.02693	0.049499
ME23	COPPER ION TRANSMEMBRANE TRANSPORT	39	0	0.00262286
ME23	RESPONSE TO FREEZING	127	0	0.0056039
ME23	LIGNIN CATABOLIC PROCESS	19	0	0.00634006
ME23	CELLULAR COPPER ION HOMEOSTASIS	45	0	0.00982416
ME23	TREHALOSE BIOSYNTHETIC PROCESS	47	0	0.00820805
ME23	ETHYLENE-ACTIVATED SIGNALING PATHWAY	355	0	0.0161956
ME23	ZINC ION TRANSMEMBRANE TRANSPORT	30	0.00181818	0.0154901
ME23	EXTRACELLULAR POLYSACCHARIDE BIOSYNTHETIC PROCESS	89	0	0.0143111
ME23	TREHALOSE METABOLIC PROCESS	50	0	0.0185584
ME23	SUCROSE METABOLIC PROCESS	132	0	0.0173838
ME23	PHOSPHORELAY SIGNAL TRANSDUCTION SYSTEM	456	0	0.016515
ME23	RESPIRATORY GASEOUS EXCHANGE	29	0.00190476	0.019625
ME23	COPPER ION TRANSPORT	55	0	0.0190406
ME23	LIPOATE BIOSYNTHETIC PROCESS	23	0.00567108	0.0201444
ME23	REGULATION OF ARF PROTEIN SIGNAL TRANSDUCTION	80	0.00173611	0.0190389
ME23	NUCLEOTIDE-SUGAR TRANSPORT	109	0	0.0211349
ME23	GLYCOGEN BIOSYNTHETIC PROCESS	64	0.00184843	0.0236232
ME23	VACUOLAR TRANSPORT	320	0	0.0457067
ME23	MO-MOLYBDOPTERIN COFACTOR BIOSYNTHETIC PROCESS	29	0.0111317	0.0479683
ME23	AMINO ACID TRANSPORT	255	0	0.0496807
ME23	OLIGOPEPTIDE TRANSPORT	139	0	0.0491076
ME25	VACUOLAR TRANSPORT	320	0	0
ME25	RETROGRADE TRANSPORT, ENDOSOME TO GOLGI	74	0	0
ME25	VESICLE FUSION WITH GOLGI APPARATUS	51	0	0.002591
ME25	PHOSPHATIDYLCHOLINE METABOLIC PROCESS	57	0	0.0033546
ME25	AUTOPHAGIC VACUOLE ASSEMBLY	45	0	0.00362075
ME25	INTRA-GOLGI VESICLE-MEDIATED TRANSPORT	119	0	0.00577706
ME25	VESICLE DOCKING INVOLVED IN EXOCYTOSIS	42	0	0.00862138
ME25	CELLULAR COPPER ION HOMEOSTASIS	45	0	0.0111119
ME25	VESICLE DOCKING	52	0	0.0142414
ME25	RESPIRATORY CHAIN COMPLEX IV ASSEMBLY	31	0.00431965	0.0139918
ME25	RETROGRADE VESICLE-MEDIATED TRANSPORT, GOLGI TO ER	130	0	0.0142789
ME25	TRANSCRIPTION INITIATION FROM RNA POLYMERASE II PROMOTER	167	0	0.0138261
ME25	GPI ANCHOR BIOSYNTHETIC PROCESS	49	0.00423729	0.0137948
ME25	TRANSCRIPTION FROM RNA POLYMERASE III PROMOTER	101	0	0.014662
ME25	7-METHYLGUANOSINE MRNA CAPPING	65	0	0.0183399
ME25	G-PROTEIN COUPLED RECEPTOR SIGNALING PATHWAY	143	0	0.0179114
ME25	PHAGOCYTOSIS	90	0.00220264	0.0170281
ME25	7-METHYLGUANOSINE RNA CAPPING	73	0	0.0167114
ME25	CLATHRIN COAT ASSEMBLY	18	0.00421053	0.0161922
ME25	ER TO GOLGI VESICLE-MEDIATED TRANSPORT	299	0	0.0168697
ME25	REGULATION OF PH	80	0	0.0173539
ME25	EXOCYTOSIS	214	0	0.0194616
ME25	ACTIN FILAMENT POLYMERIZATION	83	0	0.0250788
ME25	PROTEIN TARGETING TO PEROXISOME	30	0.00200803	0.0320903
ME25	POSITIVE REGULATION OF AUTOPHAGY	18	0.0278373	0.043393
ME25	PROTEIN IMPORT INTO MITOCHONDRIAL INNER MEMBRANE	19	0.021097	0.0435863
ME28	TRICARBOXYLIC ACID CYCLE	100	0	0
ME28	REGULATION OF CHLOROPHYLL BIOSYNTHETIC PROCESS	80	0	0
ME28	THYLAKOID MEMBRANE ORGANIZATION	77	0	0.000961023
ME28	GLYCINE DECARBOXYLATION VIA GLYCINE CLEAVAGE SYSTEM	22	0	0.000720767
ME28	EXTRACELLULAR POLYSACCHARIDE BIOSYNTHETIC PROCESS	89	0	0.000576614
ME28	NUCLEOTIDE-SUGAR METABOLIC PROCESS	98	0	0.000480512
ME28	PURINE NUCLEOBASE METABOLIC PROCESS	60	0	0.000411867
ME28	AROMATIC AMINO ACID FAMILY BIOSYNTHETIC PROCESS	119	0	0.000360384
ME28	ACYL-COA METABOLIC PROCESS	149	0	0.000667398
ME28	ATP SYNTHESIS COUPLED ELECTRON TRANSPORT	98	0	0.00105538
ME28	CHLOROPHYLL BIOSYNTHETIC PROCESS	164	0	0.00154204
ME28	GLYCINE CATABOLIC PROCESS	45	0	0.00141354
ME28	PURINE NUCLEOBASE BIOSYNTHETIC PROCESS	34	0	0.0013048
ME28	RESPIRATORY ELECTRON TRANSPORT CHAIN	158	0	0.0012116
ME28	AEROBIC RESPIRATION	224	0	0.00113083
ME28	AROMATIC AMINO ACID FAMILY METABOLIC PROCESS	172	0	0.00115043
ME28	MITOCHONDRIAL ELECTRON TRANSPORT, NADH TO UBIQUINONE	43	0	0.00108276
ME28	MO-MOLYBDOPTERIN COFACTOR BIOSYNTHETIC PROCESS	29	0	0.00110398
ME28	MOLYBDOPTERIN COFACTOR BIOSYNTHETIC PROCESS	30	0.00240385	0.0014474
ME28	PTERIDINE-CONTAINING COMPOUND METABOLIC PROCESS	53	0	0.0020039
ME28	GLUCOSE CATABOLIC PROCESS	297	0	0.00190848
ME28	BRANCHED-CHAIN AMINO ACID BIOSYNTHETIC PROCESS	33	0	0.00212597
ME28	FOLIC ACID-CONTAINING COMPOUND METABOLIC PROCESS	47	0	0.00289673
ME28	NITRATE ASSIMILATION	21	0	0.00296872
ME28	METHIONINE BIOSYNTHETIC PROCESS	62	0	0.00339717
ME28	METHIONINE METABOLIC PROCESS	66	0	0.00326651
ME28	ONE-CARBON METABOLIC PROCESS	58	0	0.00320345
ME28	MITOCHONDRIAL TRANSPORT	217	0	0.00325277
ME28	CELLULOSE BIOSYNTHETIC PROCESS	85	0	0.00350987
ME28	GLYCOLYSIS	204	0	0.00344424
ME28	ARGININE METABOLIC PROCESS	30	0	0.0051766
ME28	GLYCINE METABOLIC PROCESS	57	0	0.0058362
ME28	TRYPTOPHAN BIOSYNTHETIC PROCESS	61	0	0.00745103
ME28	GLYOXYLATE CYCLE	55	0	0.00731024
ME28	IRON-SULFUR CLUSTER ASSEMBLY	46	0.00239808	0.00714413
ME28	MANNOSE METABOLIC PROCESS	18	0.00689655	0.00887436
ME28	PORPHYRIN-CONTAINING COMPOUND BIOSYNTHETIC PROCESS	222	0	0.00901192
ME28	ATP CATABOLIC PROCESS	410	0	0.00918675
ME28	COFACTOR BIOSYNTHETIC PROCESS	469	0	0.00937628
ME28	LIGNIN CATABOLIC PROCESS	19	0.00688073	0.00932753
ME28	PROTEIN TARGETING TO MITOCHONDRION	134	0	0.0098719
ME28	GLUCOSE METABOLIC PROCESS	452	0	0.00963685
ME28	TETRAPYRROLE BIOSYNTHETIC PROCESS	242	0	0.011237
ME28	L-SERINE METABOLIC PROCESS	66	0	0.0109816
ME28	DNA METHYLATION	85	0	0.010874
ME28	PROTEIN N-LINKED GLYCOSYLATION	148	0	0.0137278
ME28	TRYPTOPHAN METABOLIC PROCESS	81	0	0.0140312
ME28	FATTY-ACYL-COA BIOSYNTHETIC PROCESS	24	0.00665188	0.0140964
ME28	CHROMATIN REMODELING	209	0	0.0159767
ME28	TYROSINE BIOSYNTHETIC PROCESS	20	0.0109649	0.0156571
ME28	CHORISMATE METABOLIC PROCESS	15	0.0181406	0.0192121
ME28	PENTOSE-PHOSPHATE SHUNT	102	0	0.0189633
ME28	RIBOFLAVIN BIOSYNTHETIC PROCESS	18	0.0154867	0.0186055
ME28	MITOCHONDRIAL ELECTRON TRANSPORT, UBIQUINOL TO CYTOCHROME C	28	0.0118765	0.0196065
ME28	NUCLEAR-TRANSCRIBED MRNA CATABOLIC PROCESS, NONSENSE-MEDIATED DECAY	123	0.00534759	0.0201469
ME28	PHOTOSYNTHESIS, LIGHT REACTION	259	0	0.0202299
ME28	NUCLEOSOME ASSEMBLY	193	0	0.0237254
ME28	PURINE RIBONUCLEOSIDE MONOPHOSPHATE BIOSYNTHETIC PROCESS	209	0	0.0240214
ME28	FUMARATE METABOLIC PROCESS	16	0.0197802	0.0240533
ME28	SPLICEOSOMAL COMPLEX ASSEMBLY	129	0	0.0271338
ME28	GENE SILENCING BY RNA	196	0	0.0297329
ME28	RIBONUCLEOSIDE MONOPHOSPHATE BIOSYNTHETIC PROCESS	243	0	0.030162
ME28	FOLIC ACID-CONTAINING COMPOUND BIOSYNTHETIC PROCESS	21	0.0294118	0.0369073
ME28	TUBULIN COMPLEX ASSEMBLY	41	0.0229008	0.0408829
ME28	L-PHENYLALANINE CATABOLIC PROCESS	31	0.0278422	0.0444682
ME28	IRON ION TRANSMEMBRANE TRANSPORT	38	0.01566	0.0458286
ME28	CELL CYCLE ARREST	347	0	0.0488999
ME28	PROTEIN GLYCOSYLATION	293	0	0.0482269
ME33	INTRA-GOLGI VESICLE-MEDIATED TRANSPORT	119	0	0
ME33	RETROGRADE VESICLE-MEDIATED TRANSPORT, GOLGI TO ER	130	0	0
ME33	RESPIRATORY ELECTRON TRANSPORT CHAIN	158	0	0
ME33	ER TO GOLGI VESICLE-MEDIATED TRANSPORT	299	0	0
ME33	REGULATION OF ARF PROTEIN SIGNAL TRANSDUCTION	80	0	0
ME33	EXTRACELLULAR POLYSACCHARIDE BIOSYNTHETIC PROCESS	89	0	0
ME33	RESPIRATORY GASEOUS EXCHANGE	29	0	0
ME33	VACUOLAR TRANSPORT	320	0	0
ME33	NUCLEOTIDE-SUGAR TRANSPORT	109	0	0
ME33	ATP SYNTHESIS COUPLED ELECTRON TRANSPORT	98	0	0.000168142
ME33	REGULATION OF PH	80	0	0.000152856
ME33	MITOCHONDRIAL ELECTRON TRANSPORT, UBIQUINOL TO CYTOCHROME C	28	0	0.000277799
ME33	CLATHRIN COAT ASSEMBLY	18	0	0.00025643
ME33	VESICLE FUSION WITH GOLGI APPARATUS	51	0	0.000468552
ME33	COPII VESICLE COATING	18	0	0.000537052
ME33	VESICLE DOCKING	52	0	0.000503486
ME33	LIPOATE BIOSYNTHETIC PROCESS	23	0	0.000752525
ME33	PROTEIN RETENTION IN ER LUMEN	51	0	0.0010493
ME33	PROTEIN GLYCOSYLATION	293	0	0.000994077
ME33	CELLULAR COPPER ION HOMEOSTASIS	45	0	0.000944374
ME33	ATP HYDROLYSIS COUPLED PROTON TRANSPORT	126	0	0.000899403
ME33	LIGNIN CATABOLIC PROCESS	19	0.00239234	0.000995745
ME33	REGULATION OF SMALL GTPASE MEDIATED SIGNAL TRANSDUCTION	290	0	0.00103113
ME33	REGULATION OF ARF GTPASE ACTIVITY	56	0	0.00105201
ME33	AEROBIC RESPIRATION	224	0	0.00107379
ME33	RETROGRADE TRANSPORT, ENDOSOME TO GOLGI	74	0	0.00103249
ME33	ATP SYNTHESIS COUPLED PROTON TRANSPORT	114	0	0.00151371
ME33	PROTON TRANSPORT	257	0	0.00331246
ME33	NUCLEOTIDE-SUGAR METABOLIC PROCESS	98	0	0.00430871
ME33	GLYCINE CATABOLIC PROCESS	45	0	0.00649492
ME33	CELLULAR IRON ION HOMEOSTASIS	137	0	0.00821477
ME33	TRICARBOXYLIC ACID CYCLE	100	0	0.00851265
ME33	REGULATION OF ACTIN FILAMENT POLYMERIZATION	89	0	0.00856621
ME33	ISOCITRATE METABOLIC PROCESS	19	0	0.0084061
ME33	VESICLE DOCKING INVOLVED IN EXOCYTOSIS	42	0	0.0083001
ME33	ACTIN FILAMENT POLYMERIZATION	83	0	0.0124695
ME33	MITOCHONDRIAL ELECTRON TRANSPORT, NADH TO UBIQUINONE	43	0.0028169	0.0128227
ME33	CELL ADHESION	201	0	0.0126875
ME33	MO-MOLYBDOPTERIN COFACTOR BIOSYNTHETIC PROCESS	29	0.00485437	0.0126426
ME33	PEROXISOME FISSION	28	0.00254453	0.0126546
ME33	COPPER ION TRANSPORT	55	0	0.0125052
ME33	PROTEIN KINASE C-ACTIVATING G-PROTEIN COUPLED RECEPTOR SIGNALING PATHWAY	30	0.00253807	0.0152086
ME33	COPPER ION TRANSMEMBRANE TRANSPORT	39	0.00271003	0.0165746
ME33	CHLORIDE TRANSPORT	21	0.0162413	0.0167843
ME33	AUTOPHAGIC VACUOLE ASSEMBLY	45	0.00769231	0.016756
ME33	ATP BIOSYNTHETIC PROCESS	175	0	0.0174709
ME33	EXOCYTOSIS	214	0	0.0183031
ME33	ACTIN CYTOSKELETON ORGANIZATION	421	0	0.0182295
ME33	MOLYBDOPTERIN COFACTOR BIOSYNTHETIC PROCESS	30	0.00257069	0.0186162
ME33	CARBOHYDRATE TRANSPORT	301	0	0.019248
ME33	GLYOXYLATE CYCLE	55	0	0.0208194
ME33	GLYCINE METABOLIC PROCESS	57	0.00280112	0.0210033
ME33	PHOSPHATIDYLINOSITOL METABOLIC PROCESS	186	0	0.0254923
ME33	PROTEIN N-LINKED GLYCOSYLATION	148	0.00324675	0.0286109
ME33	CERAMIDE METABOLIC PROCESS	64	0.00819672	0.0293703
ME33	CYTOCHROME COMPLEX ASSEMBLY	41	0.0153846	0.0339195
ME33	TREHALOSE BIOSYNTHETIC PROCESS	47	0.0189189	0.0341263
ME33	FATTY ACID BETA-OXIDATION	104	0.00327869	0.0335379
ME33	PEPTIDYL-HISTIDINE PHOSPHORYLATION	20	0.0282776	0.0348092
ME33	CELLULOSE BIOSYNTHETIC PROCESS	85	0.00295858	0.0347682
ME33	REGULATION OF DNA REPAIR	121	0	0.0358117
ME33	SPHINGOLIPID METABOLIC PROCESS	160	0	0.036435
ME33	GLYCEROL METABOLIC PROCESS	43	0.0216216	0.0414847
ME33	REGULATION OF TRANSLATIONAL INITIATION	99	0	0.0428773
ME33	PEROXISOME ORGANIZATION	90	0.011396	0.0460997
ME33	TREHALOSE METABOLIC PROCESS	50	0.0104439	0.0454544
ME33	IRON ION TRANSMEMBRANE TRANSPORT	38	0.0314961	0.0479276
ME33	AMINO ACID TRANSPORT	255	0	0.0479097
ME33	IRON ION TRANSPORT	211	0	0.0474958
ME33	GLYCOGEN BIOSYNTHETIC PROCESS	64	0.00835655	0.0477468
ME37	LIGNIN CATABOLIC PROCESS	19	0	0
ME37	COPPER ION TRANSMEMBRANE TRANSPORT	39	0	0
ME37	RESPONSE TO FREEZING	127	0	0.00343868
ME37	TRYPTOPHAN BIOSYNTHETIC PROCESS	61	0	0.00301563
ME37	ETHYLENE-ACTIVATED SIGNALING PATHWAY	355	0	0.00257173
ME37	CELLULOSE BIOSYNTHETIC PROCESS	85	0	0.00402426
ME37	NITRATE ASSIMILATION	21	0.00198807	0.0042145
ME37	EXTRACELLULAR POLYSACCHARIDE BIOSYNTHETIC PROCESS	89	0	0.0053245
ME37	ZINC ION TRANSMEMBRANE TRANSPORT	30	0	0.0050208
ME37	PHOSPHORELAY SIGNAL TRANSDUCTION SYSTEM	456	0	0.00580063
ME37	IRON ION TRANSMEMBRANE TRANSPORT	38	0	0.00659931
ME37	COPPER ION TRANSPORT	55	0	0.00820809
ME37	AMINO ACID TRANSPORT	255	0	0.00764241
ME37	CELLULAR COPPER ION HOMEOSTASIS	45	0	0.00966539
ME37	TREHALOSE BIOSYNTHETIC PROCESS	47	0.00190114	0.0114875
ME37	GLYCINE CATABOLIC PROCESS	45	0	0.0143916
ME37	TREHALOSE METABOLIC PROCESS	50	0.00185185	0.0156987
ME37	ABSCISIC ACID BIOSYNTHETIC PROCESS	100	0	0.0208024
ME37	SUCROSE METABOLIC PROCESS	132	0.0019305	0.0368509
ME37	GLYCOGEN BIOSYNTHETIC PROCESS	64	0.003861	0.043172
ME37	PROLINE BIOSYNTHETIC PROCESS	42	0.00553506	0.0441531
ME37	TRYPTOPHAN METABOLIC PROCESS	81	0.00194932	0.0439937
ME37	FLAVONOID BIOSYNTHETIC PROCESS	394	0	0.0422309
ME37	AMINO ACID TRANSMEMBRANE TRANSPORT	98	0.00184843	0.0442007
ME37	OLIGOPEPTIDE TRANSPORT	139	0.00361664	0.0436397
ME37	GLYCINE METABOLIC PROCESS	57	0.00564972	0.0430876
ME37	NUCLEOTIDE-SUGAR TRANSPORT	109	0.00353982	0.0455756
ME41	NUCLEOSOME ASSEMBLY	193	0	0
ME41	CHROMATIN ASSEMBLY OR DISASSEMBLY	278	0	0
ME41	REGULATION OF MERISTEM STRUCTURAL ORGANIZATION	87	0	0
ME41	TELOMERE MAINTENANCE	172	0	0.00013206
ME41	RESPONSE TO FREEZING	127	0	0.000974962
ME41	L-PHENYLALANINE CATABOLIC PROCESS	31	0	0.00126229
ME41	ATP-DEPENDENT CHROMATIN REMODELING	66	0	0.00108197
ME41	FLAVONOID BIOSYNTHETIC PROCESS	394	0	0.00135709
ME41	PHOSPHATIDYLINOSITOL-MEDIATED SIGNALING	82	0	0.00295992
ME41	DNA METHYLATION	85	0	0.00401979
ME41	POLYSACCHARIDE CATABOLIC PROCESS	324	0	0.00404289
ME41	CHROMATIN REMODELING	209	0	0.00456076
ME41	WATER TRANSPORT	76	0	0.00420993
ME41	CYTOKININ METABOLIC PROCESS	68	0.00125471	0.00398921
ME41	DNA-DEPENDENT DNA REPLICATION	238	0	0.00416272
ME41	RECOGNITION OF POLLEN	71	0	0.00485676
ME41	GLUTATHIONE BIOSYNTHETIC PROCESS	19	0	0.00533607
ME41	DNA REPLICATION INITIATION	54	0.00123001	0.00779356
ME41	RESPONSE TO DESICCATION	111	0	0.00741174
ME41	SUCROSE BIOSYNTHETIC PROCESS	68	0	0.00820893
ME41	PROTEIN-CHROMOPHORE LINKAGE	43	0	0.00914175
ME41	OLIGOSACCHARIDE BIOSYNTHETIC PROCESS	186	0	0.00872622
ME41	TRYPTOPHAN BIOSYNTHETIC PROCESS	61	0	0.0116395
ME41	THIAMINE BIOSYNTHETIC PROCESS	29	0.00688705	0.0128064
ME41	PHOTOSYNTHESIS, LIGHT HARVESTING	65	0	0.0134506
ME41	RESPONSE TO ALUMINUM ION	40	0	0.0137063
ME41	OLIGOPEPTIDE TRANSPORT	139	0	0.0151895
ME41	REGULATION OF CHLOROPHYLL BIOSYNTHETIC PROCESS	80	0.00115473	0.014647
ME41	PHOSPHORELAY SIGNAL TRANSDUCTION SYSTEM	456	0	0.0157936
ME41	CELL WALL MODIFICATION	449	0	0.033352
ME41	SPLICEOSOMAL COMPLEX ASSEMBLY	129	0.00109529	0.0323482
ME41	CELL VOLUME HOMEOSTASIS	59	0.00492005	0.0316963
ME41	DNA REPLICATION	472	0	0.0324389
ME41	THYLAKOID MEMBRANE ORGANIZATION	77	0.00565611	0.0389161
ME41	SUCROSE METABOLIC PROCESS	132	0.00653595	0.039945
ME41	SOS RESPONSE	15	0.0297872	0.0477784
ME41	ETHYLENE-ACTIVATED SIGNALING PATHWAY	355	0	0.0467802
ME41	CHLOROPHYLL BIOSYNTHETIC PROCESS	164	0.00214823	0.0486159
ME41	ARGININE METABOLIC PROCESS	30	0.0227273	0.0474939
ME44	CELLULAR COPPER ION HOMEOSTASIS	45	0	0
ME44	VACUOLAR TRANSPORT	320	0	0.000463576
ME44	AUTOPHAGIC VACUOLE ASSEMBLY	45	0	0.000309051
ME44	COPPER ION TRANSMEMBRANE TRANSPORT	39	0	0.00265345
ME44	LIGNIN CATABOLIC PROCESS	19	0	0.00287654
ME44	TREHALOSE METABOLIC PROCESS	50	0.00240964	0.0132001
ME44	TREHALOSE BIOSYNTHETIC PROCESS	47	0.00224719	0.0126889
ME44	AMINO ACID TRANSPORT	255	0	0.0196111
ME44	SUCROSE METABOLIC PROCESS	132	0	0.0229226
ME44	COPPER ION TRANSPORT	55	0	0.0219624
ME44	PROTEIN ADP-RIBOSYLATION	49	0.00225225	0.0213502
ME44	INTRA-GOLGI VESICLE-MEDIATED TRANSPORT	119	0	0.0196543
ME44	AUTOPHAGY	168	0	0.0184276
ME44	FATTY ACID BETA-OXIDATION	104	0	0.0205022
ME44	LIPID CATABOLIC PROCESS	293	0	0.0227194
ME44	COENZYME A BIOSYNTHETIC PROCESS	17	0.00867679	0.0229041
ME44	VESICLE FUSION WITH GOLGI APPARATUS	51	0.00928074	0.0217182
ME44	REGULATION OF DNA REPAIR	121	0	0.0208206
ME44	ER TO GOLGI VESICLE-MEDIATED TRANSPORT	299	0	0.0226674
ME44	RETROGRADE VESICLE-MEDIATED TRANSPORT, GOLGI TO ER	130	0	0.0252618
ME44	AMINO ACID TRANSMEMBRANE TRANSPORT	98	0.00232558	0.0243236
ME44	REGULATION OF ARF PROTEIN SIGNAL TRANSDUCTION	80	0.00249377	0.0240644
ME44	GLYCOGEN BIOSYNTHETIC PROCESS	64	0.00471698	0.0313197
ME44	DEPHOSPHORYLATION	473	0	0.0304181
ME44	CHLORIDE TRANSPORT	21	0.0120482	0.040283
ME44	PROTEIN KINASE C-ACTIVATING G-PROTEIN COUPLED RECEPTOR SIGNALING PATHWAY	30	0.0131004	0.040348
ME44	NUCLEOTIDE-SUGAR TRANSPORT	109	0.00244499	0.0422588
ME44	PROTEIN DEPHOSPHORYLATION	328	0	0.0463187
ME46	TELOMERE MAINTENANCE	172	0	0
ME46	NUCLEOSOME ASSEMBLY	193	0	0.000327434
ME46	DNA-DEPENDENT DNA REPLICATION	238	0	0.00332739
ME46	DNA REPLICATION	472	0	0.00326625
ME46	REGULATION OF DNA REPLICATION	172	0	0.00722579
ME46	RRNA METHYLATION	20	0	0.00705502
ME46	DNA REPLICATION INITIATION	54	0	0.00700968
ME46	RNA METHYLATION	60	0	0.00822045
ME46	MISMATCH REPAIR	39	0.00314961	0.0115986
ME46	MICROTUBULE-BASED MOVEMENT	275	0	0.0114211
ME46	CTP BIOSYNTHETIC PROCESS	21	0.0066335	0.0158802
ME46	CHROMATIN ASSEMBLY OR DISASSEMBLY	278	0	0.0179429
ME46	DOUBLE-STRAND BREAK REPAIR VIA HOMOLOGOUS RECOMBINATION	114	0	0.0172214
ME46	REGULATION OF CYCLIN-DEPENDENT PROTEIN SERINE/THREONINE KINASE ACTIVITY	77	0	0.0228477
ME46	RNA-DEPENDENT DNA REPLICATION	20	0.00513699	0.0253543
ME46	SOS RESPONSE	15	0.00518135	0.0372208
ME46	L-METHIONINE SALVAGE FROM METHYLTHIOADENOSINE	15	0.00502513	0.0377692
ME46	RRNA MODIFICATION	45	0.00309119	0.0400742
ME46	SUCROSE BIOSYNTHETIC PROCESS	68	0.00301205	0.0428665
ME52	RESPIRATORY ELECTRON TRANSPORT CHAIN	158	0	0
ME52	ATP HYDROLYSIS COUPLED PROTON TRANSPORT	126	0	0
ME52	RETROGRADE VESICLE-MEDIATED TRANSPORT, GOLGI TO ER	130	0	0
ME52	ATP SYNTHESIS COUPLED PROTON TRANSPORT	114	0	0
ME52	VACUOLAR TRANSPORT	320	0	0
ME52	ATP SYNTHESIS COUPLED ELECTRON TRANSPORT	98	0	0
ME52	INTRA-GOLGI VESICLE-MEDIATED TRANSPORT	119	0	0
ME52	VESICLE FUSION WITH GOLGI APPARATUS	51	0	0
ME52	REGULATION OF PH	80	0	0
ME52	RETROGRADE TRANSPORT, ENDOSOME TO GOLGI	74	0	0
ME52	MITOCHONDRIAL ELECTRON TRANSPORT, UBIQUINOL TO CYTOCHROME C	28	0	0
ME52	ER TO GOLGI VESICLE-MEDIATED TRANSPORT	299	0	0
ME52	AUTOPHAGIC VACUOLE ASSEMBLY	45	0	0
ME52	PROTEIN N-LINKED GLYCOSYLATION VIA ASPARAGINE	100	0	0
ME52	CELLULAR COPPER ION HOMEOSTASIS	45	0	0
ME52	LIPOATE BIOSYNTHETIC PROCESS	23	0	0
ME52	VESICLE DOCKING	52	0	0
ME52	PROTEIN N-LINKED GLYCOSYLATION	148	0	0
ME52	PROTON TRANSPORT	257	0	0
ME52	RESPIRATORY CHAIN COMPLEX IV ASSEMBLY	31	0	0
ME52	MITOCHONDRIAL ELECTRON TRANSPORT, NADH TO UBIQUINONE	43	0	0
ME52	PROTEIN GLYCOSYLATION	293	0	0
ME52	REGULATION OF TRANSLATIONAL FIDELITY	66	0	0.000103547
ME52	PHAGOCYTOSIS	90	0	9.92325e-05
ME52	RESPIRATORY GASEOUS EXCHANGE	29	0	9.52632e-05
ME52	ATP BIOSYNTHETIC PROCESS	175	0	9.15992e-05
ME52	CLATHRIN COAT ASSEMBLY	18	0	8.82066e-05
ME52	PROTEIN IMPORT INTO MITOCHONDRIAL INNER MEMBRANE	19	0	8.50564e-05
ME52	VESICLE DOCKING INVOLVED IN EXOCYTOSIS	42	0	8.21234e-05
ME52	CELLULAR IRON ION HOMEOSTASIS	137	0	7.9386e-05
ME52	ACTIN FILAMENT POLYMERIZATION	83	0	7.68251e-05
ME52	CYTOCHROME COMPLEX ASSEMBLY	41	0	7.44243e-05
ME52	NUCLEOTIDE-SUGAR TRANSPORT	109	0	7.21691e-05
ME52	POSITIVE REGULATION OF AUTOPHAGY	18	0	0.000191532
ME52	G-PROTEIN COUPLED RECEPTOR SIGNALING PATHWAY	143	0	0.00023676
ME52	PEROXISOME FISSION	28	0	0.000230183
ME52	REGULATION OF ARF GTPASE ACTIVITY	56	0	0.000275456
ME52	AEROBIC RESPIRATION	224	0	0.000324244
ME52	PROTEIN POLYMERIZATION	246	0	0.000368077
ME52	ANAPHASE-PROMOTING COMPLEX-DEPENDENT PROTEASOMAL UBIQUITIN-DEPENDENT PROTEIN CATABOLIC PROCESS	284	0	0.000358875
ME52	EXOCYTOSIS	214	0	0.000594157
ME52	PURINE RIBONUCLEOTIDE BIOSYNTHETIC PROCESS	271	0	0.00058001
ME52	PURINE RIBONUCLEOSIDE MONOPHOSPHATE BIOSYNTHETIC PROCESS	209	0	0.000707953
ME52	GPI ANCHOR BIOSYNTHETIC PROCESS	49	0	0.00084616
ME52	PURINE NUCLEOTIDE BIOSYNTHETIC PROCESS	281	0	0.000871556
ME52	RIBOSOME ASSEMBLY	184	0	0.000852609
ME52	TRICARBOXYLIC ACID CYCLE	100	0	0.00106879
ME52	REGULATION OF ARF PROTEIN SIGNAL TRANSDUCTION	80	0	0.00120959
ME52	TRANSLATIONAL INITIATION	290	0	0.00123166
ME52	PROTEIN RETENTION IN ER LUMEN	51	0	0.0014913
ME52	GPI ANCHOR METABOLIC PROCESS	70	0	0.00150106
ME52	MALATE METABOLIC PROCESS	35	0	0.00183285
ME52	RIBONUCLEOSIDE MONOPHOSPHATE BIOSYNTHETIC PROCESS	243	0	0.00293408
ME52	IRON ION TRANSPORT	211	0	0.0034404
ME52	REGULATION OF ACTIN FILAMENT POLYMERIZATION	89	0	0.00362958
ME52	ELECTRON TRANSPORT CHAIN	422	0	0.00360324
ME52	RIBOFLAVIN BIOSYNTHETIC PROCESS	18	0	0.00408186
ME52	UBIQUINONE BIOSYNTHETIC PROCESS	19	0.00550964	0.00453925
ME52	NUCLEOTIDE BIOSYNTHETIC PROCESS	456	0	0.0047549
ME52	PROTEIN ADP-RIBOSYLATION	49	0	0.00487972
ME52	ACTIN CYTOSKELETON ORGANIZATION	421	0	0.00500548
ME52	SPHINGOLIPID METABOLIC PROCESS	160	0	0.00671368
ME52	PHOSPHATIDYLINOSITOL METABOLIC PROCESS	186	0	0.011909
ME52	MITOCHONDRIAL TRANSPORT	217	0	0.0131795
ME52	NUCLEOTIDE-SUGAR METABOLIC PROCESS	98	0	0.0155207
ME52	GLUCONEOGENESIS	100	0	0.018128
ME52	PHOSPHOLIPID BIOSYNTHETIC PROCESS	318	0	0.0194547
ME52	PROTEIN PRENYLATION	16	0.025	0.0207948
ME52	AUTOPHAGY	168	0	0.0211373
ME52	COPII VESICLE COATING	18	0.010989	0.0259254
ME52	HISTIDINE BIOSYNTHETIC PROCESS	28	0.0160772	0.0272047
ME52	HEME BIOSYNTHETIC PROCESS	49	0.00689655	0.0290104
ME52	PROTEIN IMPORT INTO NUCLEUS	239	0	0.0293712
ME52	GLYOXYLATE CYCLE	55	0	0.0294191
ME52	CERAMIDE METABOLIC PROCESS	64	0.00362319	0.0306293
ME52	GLYCEROL METABOLIC PROCESS	43	0.016835	0.0318166
ME52	EXTRACELLULAR POLYSACCHARIDE BIOSYNTHETIC PROCESS	89	0	0.0362549
ME52	PROTEIN IMPORT	377	0	0.0390895
ME52	ISOCITRATE METABOLIC PROCESS	19	0.048	0.0392974
ME52	GLYCOLYSIS	204	0	0.0393033
ME52	TRANSCRIPTION FROM RNA POLYMERASE III PROMOTER	101	0.00408163	0.0399634
ME52	PEROXISOME ORGANIZATION	90	0	0.0395264
ME52	FATTY ACID BETA-OXIDATION	104	0.00431035	0.0396066
ME52	LIPID CATABOLIC PROCESS	293	0	0.039252
ME52	GLYCINE CATABOLIC PROCESS	45	0.0131148	0.0423548
ME52	SRP-DEPENDENT COTRANSLATIONAL PROTEIN TARGETING TO MEMBRANE	20	0.0444444	0.0420074

## Sheet: Joint Network Modules
Table S3: Biological Process Gene Ontology terms enriched in co-expression modules in joint gene co-expression network
MODULE	NAME	SIZE	NOM p-val	FDR q-val
ME1	CELL WALL BIOGENESIS	310	0	0.000763314
ME1	PHOSPHORELAY SIGNAL TRANSDUCTION SYSTEM	260	0	0.0134676
ME1	ETHYLENE-ACTIVATED SIGNALING PATHWAY	199	0	0.0092255
ME1	COPPER ION TRANSMEMBRANE TRANSPORT	26	0	0.00708797
ME1	RESPONSE TO FREEZING	74	0	0.0392266
ME1	SUCROSE METABOLIC PROCESS	74	0	0.0328103
ME2	TRANSLATIONAL ELONGATION	394	0	0
ME2	TRANSLATIONAL TERMINATION	353	0	0
ME2	RIBOSOME BIOGENESIS	467	0	0
ME2	RRNA PROCESSING	291	0	0
ME2	RIBOSOME ASSEMBLY	96	0	0
ME2	REGULATION OF TRANSLATIONAL FIDELITY	36	0	0
ME2	TRNA AMINOACYLATION	84	0	0
ME2	TRNA AMINOACYLATION FOR PROTEIN TRANSLATION	84	0	0
ME2	RNA METHYLATION	32	0	0
ME2	TUBULIN COMPLEX ASSEMBLY	21	0	0
ME2	RRNA MODIFICATION	23	0	0
ME2	PSEUDOURIDINE SYNTHESIS	23	0	0.000221176
ME2	TRNA PROCESSING	159	0	0.000204162
ME2	RNA MODIFICATION	325	0	0.00177858
ME2	PROTEIN N-LINKED GLYCOSYLATION VIA ASPARAGINE	51	0	0.00166001
ME2	TRANSLATIONAL INITIATION	153	0	0.00198138
ME2	PROTEIN FOLDING	294	0	0.00357259
ME2	PROTEIN N-LINKED GLYCOSYLATION	76	0	0.00757628
ME2	PROTEIN TARGETING TO MITOCHONDRION	70	0	0.00775075
ME2	FERROUS IRON TRANSPORT	25	0	0.00756985
ME2	TRNA METHYLATION	17	0.00627615	0.00765284
ME2	REGULATION OF DNA REPLICATION	87	0	0.00796352
ME2	ANAPHASE-PROMOTING COMPLEX-DEPENDENT PROTEASOMAL UBIQUITIN-DEPENDENT PROTEIN CATABOLIC PROCESS	145	0	0.00907677
ME2	TRNA MODIFICATION	61	0	0.0101994
ME2	RNA 3'-END PROCESSING	194	0	0.0109564
ME2	DNA REPLICATION	250	0	0.0109988
ME2	TELOMERE MAINTENANCE	90	0	0.0158405
ME2	PROTEIN DEACETYLATION	24	0.00618557	0.0154562
ME2	7-METHYLGUANOSINE RNA CAPPING	42	0	0.0152001
ME2	NUCLEOCYTOPLASMIC TRANSPORT	390	0	0.0165348
ME2	METHYLATION	305	0	0.0176823
ME2	TRANSCRIPTION INITIATION FROM RNA POLYMERASE II PROMOTER	90	0	0.0173845
ME2	MRNA CATABOLIC PROCESS	206	0	0.0170907
ME2	HISTONE DEACETYLATION	21	0.0120482	0.0180995
ME2	POSITIVE REGULATION OF TRANSLATIONAL ELONGATION	15	0.0105932	0.019538
ME2	GLUCONEOGENESIS	53	0	0.0191088
ME2	FATTY ACID BIOSYNTHETIC PROCESS	249	0	0.0207826
ME2	NEGATIVE REGULATION OF TRANSLATION	99	0	0.0229623
ME2	7-METHYLGUANOSINE MRNA CAPPING	38	0.00438597	0.0241514
ME2	DNA-DEPENDENT DNA REPLICATION	122	0	0.0246098
ME2	SULFATE TRANSPORT	36	0.00631579	0.0268421
ME2	ACYL-COA METABOLIC PROCESS	76	0	0.0263616
ME2	ENDOCYTOSIS	341	0	0.0281427
ME2	DNA-TEMPLATED TRANSCRIPTION, INITIATION	140	0	0.0315097
ME2	CAROTENOID BIOSYNTHETIC PROCESS	56	0.00198807	0.0323065
ME2	TRICARBOXYLIC ACID CYCLE	53	0.00207039	0.0341136
ME2	CELLULAR AMINO ACID BIOSYNTHETIC PROCESS	358	0	0.0334163
ME2	MITOCHONDRIAL TRANSPORT	115	0.00444444	0.0342958
ME2	ERGOSTEROL BIOSYNTHETIC PROCESS	16	0.028866	0.0384724
ME2	DNA-TEMPLATED TRANSCRIPTION, TERMINATION	120	0	0.0425117
ME2	PROTEIN METHYLATION	204	0	0.0473221
ME2	GLYCOLYSIS	111	0.00230415	0.0470563
ME2	CARBON FIXATION	36	0.0293542	0.0470127
ME3	REGULATION OF MERISTEM STRUCTURAL ORGANIZATION	46	0	0.0128799
ME3	POSITIVE REGULATION OF TRANSCRIPTION, DNA-TEMPLATED	401	0	0.00643993
ME3	POLYSACCHARIDE CATABOLIC PROCESS	184	0	0.0102088
ME3	FLAVONOID BIOSYNTHETIC PROCESS	244	0	0.011321
ME3	RESPONSE TO DESICCATION	67	0.00154083	0.0114992
ME3	RECOGNITION OF POLLEN	51	0	0.0154703
ME3	DEFENSE RESPONSE TO FUNGUS	490	0	0.016183
ME3	COPPER ION TRANSMEMBRANE TRANSPORT	26	0.00167224	0.0151389
ME3	PHOSPHORELAY SIGNAL TRANSDUCTION SYSTEM	260	0	0.0189169
ME3	CYTOKININ METABOLIC PROCESS	41	0.009375	0.0194234
ME3	SUCROSE METABOLIC PROCESS	74	0.00301659	0.0190284
ME3	CHLOROPHYLL CATABOLIC PROCESS	22	0.00314961	0.0187312
ME3	DNA METHYLATION	44	0.00626959	0.0193681
ME3	ETHYLENE-ACTIVATED SIGNALING PATHWAY	199	0	0.0221851
ME3	OLIGOSACCHARIDE BIOSYNTHETIC PROCESS	107	0.0014771	0.0207061
ME3	WATER TRANSPORT	40	0.00483871	0.0225996
ME3	RESPONSE TO FREEZING	74	0.00148148	0.0241601
ME3	OLIGOPEPTIDE TRANSPORT	85	0	0.0257916
ME3	(1->3)-BETA-D-GLUCAN BIOSYNTHETIC PROCESS	17	0.0140598	0.0245883
ME3	CELL WALL BIOGENESIS	310	0	0.0312211
ME3	L-PHENYLALANINE CATABOLIC PROCESS	17	0.0198347	0.0320151
ME3	SUCROSE BIOSYNTHETIC PROCESS	40	0.00930233	0.0312471
ME3	OLIGOSACCHARIDE METABOLIC PROCESS	190	0	0.0456406
ME4	RNA MODIFICATION	325	0	0
ME4	RNA METHYLATION	32	0	0.000423313
ME4	TRNA PROCESSING	159	0	0.000282209
ME4	PSEUDOURIDINE SYNTHESIS	23	0.00205339	0.000211656
ME4	DNA METHYLATION	44	0	0.000169325
ME4	REGULATION OF DNA REPLICATION	87	0	0.000141104
ME4	METHYLATION	305	0	0.000493232
ME4	RRNA PROCESSING	291	0	0.000431578
ME4	GENE SILENCING BY RNA	101	0	0.000477121
ME4	RIBOSOME BIOGENESIS	467	0	0.00051787
ME4	RRNA MODIFICATION	23	0	0.000548232
ME4	DNA REPLICATION	250	0	0.000502546
ME4	TRNA METHYLATION	17	0	0.000463889
ME4	FERROUS IRON TRANSPORT	25	0	0.000981069
ME4	CHROMATIN REMODELING	105	0	0.00114441
ME4	TRNA MODIFICATION	61	0	0.00112484
ME4	HISTONE MODIFICATION	410	0	0.00105868
ME4	TRNA AMINOACYLATION FOR PROTEIN TRANSLATION	84	0	0.00241074
ME4	ATP-DEPENDENT CHROMATIN REMODELING	33	0	0.00228385
ME4	TRNA AMINOACYLATION	84	0	0.00234644
ME4	GENE SILENCING	234	0	0.0116891
ME4	PROTEIN METHYLATION	204	0	0.0114397
ME4	TUBULIN COMPLEX ASSEMBLY	21	0.00193424	0.0201179
ME4	HISTONE DEACETYLATION	21	0.00380952	0.0206098
ME4	DNA-DEPENDENT DNA REPLICATION	122	0	0.0212282
ME4	RNA 3'-END PROCESSING	194	0	0.023868
ME4	DNA RECOMBINATION	228	0	0.0246321
ME4	BASE-EXCISION REPAIR	39	0.00200401	0.0250627
ME4	CHLOROPHYLL BIOSYNTHETIC PROCESS	84	0.00210084	0.0316223
ME4	MRNA CATABOLIC PROCESS	206	0	0.0310728
ME4	RNA SPLICING	494	0	0.0301803
ME4	DNA-TEMPLATED TRANSCRIPTION, INITIATION	140	0	0.0309978
ME4	REGULATION OF TRANSCRIPTION FROM RNA POLYMERASE II PROMOTER	333	0	0.0300585
ME4	G2/M TRANSITION OF MITOTIC CELL CYCLE	106	0	0.0308221
ME4	TELOMERE MAINTENANCE	90	0.00194932	0.0311748
ME4	PROTEIN DEACETYLATION	24	0.0170778	0.0318783
ME4	SULFATE TRANSPORT	36	0.0142276	0.0368683
ME4	REGULATION OF CHLOROPHYLL BIOSYNTHETIC PROCESS	41	0.0134357	0.040905
ME5	TRNA AMINOACYLATION FOR PROTEIN TRANSLATION	84	0	0
ME5	TRNA AMINOACYLATION	84	0	0
ME5	TRNA PROCESSING	159	0	0
ME5	RNA METHYLATION	32	0	0
ME5	HISTIDINE BIOSYNTHETIC PROCESS	16	0	0.000155319
ME5	TRNA METHYLATION	17	0	0.000246985
ME5	RIBOSOME BIOGENESIS	467	0	0.00246676
ME5	RRNA PROCESSING	291	0	0.00253171
ME5	TRNA MODIFICATION	61	0	0.00225041
ME5	7-METHYLGUANOSINE RNA CAPPING	42	0	0.00344484
ME5	PSEUDOURIDINE SYNTHESIS	23	0.00368324	0.00643196
ME5	7-METHYLGUANOSINE MRNA CAPPING	38	0.00183824	0.00614534
ME5	DNA REPLICATION	250	0	0.00596242
ME5	TRANSLATIONAL TERMINATION	353	0	0.0151189
ME5	TRANSCRIPTION FROM RNA POLYMERASE III PROMOTER	56	0.00167785	0.016932
ME5	PROTEIN FOLDING	294	0	0.0175143
ME5	FERROUS IRON TRANSPORT	25	0.00549451	0.0189931
ME5	METHYLATION	305	0	0.0330262
ME5	GLYCOLIPID BIOSYNTHETIC PROCESS	41	0.00527241	0.033859
ME5	REGULATION OF DNA REPLICATION	87	0	0.032241
ME5	PYRIMIDINE NUCLEOTIDE BIOSYNTHETIC PROCESS	35	0.00357782	0.0332226
ME5	TUBULIN COMPLEX ASSEMBLY	21	0.0145985	0.0356467
ME5	PHOSPHOLIPID BIOSYNTHETIC PROCESS	167	0.00164204	0.0350911
ME5	TRANSCRIPTION INITIATION FROM RNA POLYMERASE II PROMOTER	90	0.00165563	0.0346475
ME5	REGULATION OF TRANSLATIONAL FIDELITY	36	0.0100334	0.0356364
ME5	PHOSPHOLIPID METABOLIC PROCESS	300	0	0.0347517
ME5	DNA-TEMPLATED TRANSCRIPTION, ELONGATION	136	0.00489396	0.0373593
ME5	DNA-TEMPLATED TRANSCRIPTION, INITIATION	140	0	0.0426642
ME5	TRANSLATIONAL ELONGATION	394	0	0.0443391
ME5	GPI ANCHOR BIOSYNTHETIC PROCESS	25	0.0189983	0.0469842
ME6	RETROGRADE TRANSPORT, ENDOSOME TO GOLGI	42	0	0.00152461
ME6	VACUOLAR TRANSPORT	175	0	0.00456377
ME6	PHOSPHATIDYLCHOLINE METABOLIC PROCESS	30	0.00185874	0.0114975
ME7	DNA METHYLATION	44	0	0
ME7	REGULATION OF MERISTEM STRUCTURAL ORGANIZATION	46	0	0.00109774
ME7	CHROMATIN REMODELING	105	0	0.000731829
ME7	HISTONE MODIFICATION	410	0	0.00777425
ME7	ATP-DEPENDENT CHROMATIN REMODELING	33	0.00169492	0.0125549
ME7	RNA MODIFICATION	325	0	0.0154401
ME7	GENE SILENCING BY RNA	101	0	0.0177231
ME7	REGULATION OF CHLOROPHYLL BIOSYNTHETIC PROCESS	41	0	0.0177214
ME7	SPLICEOSOMAL COMPLEX ASSEMBLY	68	0	0.0174856
ME7	TRYPTOPHAN BIOSYNTHETIC PROCESS	33	0.0051458	0.0251773
ME7	GENE SILENCING	234	0	0.0296837
ME7	THYLAKOID MEMBRANE ORGANIZATION	40	0.00500835	0.0274491
ME7	HISTONE LYSINE METHYLATION	135	0.0014771	0.0302929
ME7	POSITIVE REGULATION OF TRANSCRIPTION, DNA-TEMPLATED	401	0	0.0366807
ME7	CALCIUM ION TRANSPORT	87	0	0.0391376
ME7	NEGATIVE REGULATION OF TRANSCRIPTION, DNA-TEMPLATED	459	0	0.0440845
ME7	THIAMINE BIOSYNTHETIC PROCESS	16	0.015873	0.0418061
ME8	AUTOPHAGIC VACUOLE ASSEMBLY	24	0	0
ME8	VACUOLAR TRANSPORT	175	0	0
ME8	CELLULAR COPPER ION HOMEOSTASIS	25	0	0.00062957
ME8	VESICLE FUSION WITH GOLGI APPARATUS	26	0	0.000720625
ME8	INTRA-GOLGI VESICLE-MEDIATED TRANSPORT	62	0	0.000958807
ME8	AUTOPHAGY	93	0	0.00128606
ME8	GOLGI VESICLE TRANSPORT	349	0	0.00232539
ME8	ER TO GOLGI VESICLE-MEDIATED TRANSPORT	159	0	0.00751668
ME8	COPPER ION TRANSPORT	34	0	0.00823001
ME8	CYTOCHROME COMPLEX ASSEMBLY	26	0.00202429	0.00976008
ME8	RETROGRADE TRANSPORT, ENDOSOME TO GOLGI	42	0	0.0230909
ME8	PROTEIN KINASE C-ACTIVATING G-PROTEIN COUPLED RECEPTOR SIGNALING PATHWAY	15	0.0020284	0.0233154
ME8	EXOCYTOSIS	114	0	0.0223359
ME8	COPPER ION TRANSMEMBRANE TRANSPORT	26	0.00581395	0.0227002
ME8	RESPIRATORY ELECTRON TRANSPORT CHAIN	96	0	0.0341163
ME8	CELLULAR HOMEOSTASIS	472	0	0.0362568
ME8	RETROGRADE VESICLE-MEDIATED TRANSPORT, GOLGI TO ER	68	0	0.034542
ME8	CELL REDOX HOMEOSTASIS	152	0	0.0338137
ME8	ATP HYDROLYSIS COUPLED PROTON TRANSPORT	71	0.00582524	0.0382214
ME8	G-PROTEIN COUPLED RECEPTOR SIGNALING PATHWAY	76	0	0.0376655
ME8	REGULATION OF PH	45	0.00202429	0.0396059
ME8	FATTY ACID BETA-OXIDATION	56	0.00412371	0.0399852
ME8	RESPIRATORY GASEOUS EXCHANGE	15	0.0138067	0.0403569
ME8	PROTEIN ADP-RIBOSYLATION	29	0.0121951	0.0416601
ME8	ATP SYNTHESIS COUPLED ELECTRON TRANSPORT	62	0.00203252	0.0445674
ME8	CELL WALL MACROMOLECULE CATABOLIC PROCESS	33	0.00617284	0.0490338
ME8	AMINO ACID TRANSMEMBRANE TRANSPORT	58	0.00776699	0.0481051
ME8	LIPID CATABOLIC PROCESS	164	0	0.046494
ME8	SMALL GTPASE MEDIATED SIGNAL TRANSDUCTION	318	0	0.044963
ME8	VESICLE DOCKING INVOLVED IN EXOCYTOSIS	23	0.0244444	0.049845
ME9	TRANSLATIONAL TERMINATION	353	0	0
ME9	TRANSLATIONAL ELONGATION	394	0	0
ME9	RESPIRATORY ELECTRON TRANSPORT CHAIN	96	0	0
ME9	RIBOSOME ASSEMBLY	96	0	0
ME9	RIBOSOME BIOGENESIS	467	0	0
ME9	ATP SYNTHESIS COUPLED ELECTRON TRANSPORT	62	0	0
ME9	REGULATION OF TRANSLATIONAL FIDELITY	36	0	0
ME9	RRNA PROCESSING	291	0	0
ME9	VACUOLAR TRANSPORT	175	0	0
ME9	RETROGRADE TRANSPORT, ENDOSOME TO GOLGI	42	0	0
ME9	ANAPHASE-PROMOTING COMPLEX-DEPENDENT PROTEASOMAL UBIQUITIN-DEPENDENT PROTEIN CATABOLIC PROCESS	145	0	0
ME9	MITOCHONDRIAL ELECTRON TRANSPORT, UBIQUINOL TO CYTOCHROME C	15	0	0.000204003
ME9	PROTEIN N-LINKED GLYCOSYLATION VIA ASPARAGINE	51	0	0.000936218
ME9	ATP SYNTHESIS COUPLED PROTON TRANSPORT	73	0	0.00348811
ME9	ATP HYDROLYSIS COUPLED PROTON TRANSPORT	71	0	0.00325557
ME9	PROTEIN TARGETING	395	0	0.00313372
ME9	GOLGI VESICLE TRANSPORT	349	0	0.00340129
ME9	TRANSLATIONAL INITIATION	153	0	0.00496668
ME9	SMALL GTPASE MEDIATED SIGNAL TRANSDUCTION	318	0	0.00735276
ME9	VESICLE FUSION WITH GOLGI APPARATUS	26	0.00233645	0.00815926
ME9	ENDOCYTOSIS	341	0	0.00857306
ME9	SPHINGOLIPID METABOLIC PROCESS	83	0	0.0082898
ME9	RESPIRATORY CHAIN COMPLEX IV ASSEMBLY	20	0.00631579	0.00861481
ME9	MITOCHONDRIAL ELECTRON TRANSPORT, NADH TO UBIQUINONE	25	0.00829876	0.0112466
ME9	GTP CATABOLIC PROCESS	329	0	0.0110525
ME9	INTRA-GOLGI VESICLE-MEDIATED TRANSPORT	62	0	0.0122604
ME9	GPI ANCHOR BIOSYNTHETIC PROCESS	25	0	0.015914
ME9	PROTEIN N-LINKED GLYCOSYLATION	76	0	0.0168984
ME9	ER TO GOLGI VESICLE-MEDIATED TRANSPORT	159	0	0.0182308
ME9	G-PROTEIN COUPLED RECEPTOR SIGNALING PATHWAY	76	0	0.0181535
ME9	TRANSCRIPTION INITIATION FROM RNA POLYMERASE II PROMOTER	90	0.00225225	0.0189635
ME9	RETROGRADE VESICLE-MEDIATED TRANSPORT, GOLGI TO ER	68	0.00224215	0.0247943
ME9	7-METHYLGUANOSINE MRNA CAPPING	38	0.00923787	0.0241168
ME9	TUBULIN COMPLEX ASSEMBLY	21	0.0213675	0.0244097
ME9	GPI ANCHOR METABOLIC PROCESS	38	0.0043956	0.0237123
ME9	ACTIN FILAMENT POLYMERIZATION	44	0.00663717	0.0236628
ME9	PROTEIN POLYMERIZATION	132	0	0.023252
ME9	REGULATION OF PH	45	0.00436681	0.0244672
ME9	ELECTRON TRANSPORT CHAIN	254	0	0.0259925
ME9	TRNA AMINOACYLATION	84	0	0.0267047
ME9	TRNA AMINOACYLATION FOR PROTEIN TRANSLATION	84	0.00207039	0.0260533
ME9	PHAGOCYTOSIS	47	0.0111111	0.0269427
ME9	REGULATION OF APOPTOTIC PROCESS	334	0	0.0277961
ME9	VESICLE DOCKING	28	0.0126582	0.0278517
ME9	GLUCONEOGENESIS	53	0.00672646	0.0280959
ME9	TRANSCRIPTION FROM RNA POLYMERASE III PROMOTER	56	0	0.0288023
ME9	SUPEROXIDE METABOLIC PROCESS	25	0.0232019	0.0349199
ME9	VESICLE DOCKING INVOLVED IN EXOCYTOSIS	23	0.0133333	0.0343181
ME9	7-METHYLGUANOSINE RNA CAPPING	42	0.00647948	0.0361926
ME9	PROTEIN INSERTION INTO MEMBRANE	18	0.0235546	0.036026
ME9	AUTOPHAGIC VACUOLE ASSEMBLY	24	0.0221774	0.03627
ME9	NUCLEOCYTOPLASMIC TRANSPORT	390	0	0.0366877
ME9	POSITIVE REGULATION OF CATALYTIC ACTIVITY	442	0	0.038871
ME9	PROTEIN IMPORT INTO NUCLEUS	130	0.00238095	0.039264
ME9	EXOCYTOSIS	114	0.00719425	0.0389235
ME9	FATTY ACID BIOSYNTHETIC PROCESS	249	0	0.0398977
ME9	PROTON TRANSPORT	152	0	0.0441099
ME10	TRANSLATIONAL ELONGATION	394	0	0
ME10	TRANSLATIONAL TERMINATION	353	0	0
ME10	RIBOSOME BIOGENESIS	467	0	0
ME10	RRNA PROCESSING	291	0	0
ME10	RIBOSOME ASSEMBLY	96	0	0
ME10	REGULATION OF TRANSLATIONAL FIDELITY	36	0	0
ME10	TRICARBOXYLIC ACID CYCLE	53	0	0
ME10	RESPIRATORY ELECTRON TRANSPORT CHAIN	96	0	0
ME10	PROTEIN N-LINKED GLYCOSYLATION	76	0	0
ME10	TRANSLATIONAL INITIATION	153	0	0
ME10	ATP SYNTHESIS COUPLED ELECTRON TRANSPORT	62	0	0
ME10	ACYL-COA METABOLIC PROCESS	76	0	0
ME10	ANAPHASE-PROMOTING COMPLEX-DEPENDENT PROTEASOMAL UBIQUITIN-DEPENDENT PROTEIN CATABOLIC PROCESS	145	0	0
ME10	TRNA AMINOACYLATION FOR PROTEIN TRANSLATION	84	0	0
ME10	ATP SYNTHESIS COUPLED PROTON TRANSPORT	73	0	0
ME10	TRNA AMINOACYLATION	84	0	0
ME10	TUBULIN COMPLEX ASSEMBLY	21	0	0
ME10	PROTEIN N-LINKED GLYCOSYLATION VIA ASPARAGINE	51	0	0
ME10	AEROBIC RESPIRATION	119	0	0
ME10	MITOCHONDRIAL TRANSPORT	115	0	0
ME10	GLUCOSE CATABOLIC PROCESS	160	0	0
ME10	GLYCOLYSIS	111	0	0
ME10	MITOCHONDRIAL ELECTRON TRANSPORT, NADH TO UBIQUINONE	25	0	7.2568e-05
ME10	CELLULAR AMINO ACID BIOSYNTHETIC PROCESS	358	0	6.95444e-05
ME10	COFACTOR BIOSYNTHETIC PROCESS	244	0	6.67626e-05
ME10	RNA MODIFICATION	325	0	6.41948e-05
ME10	GLUCOSE METABOLIC PROCESS	241	0	6.18172e-05
ME10	PROTEIN TARGETING TO MITOCHONDRION	70	0	5.96095e-05
ME10	PURINE RIBONUCLEOSIDE MONOPHOSPHATE BIOSYNTHETIC PROCESS	125	0	5.7554e-05
ME10	COFACTOR METABOLIC PROCESS	456	0	5.56355e-05
ME10	NUCLEOCYTOPLASMIC TRANSPORT	390	0	5.38408e-05
ME10	CELL CYCLE ARREST	179	0	5.21583e-05
ME10	HEXOSE METABOLIC PROCESS	283	0	0.000103838
ME10	RIBONUCLEOSIDE MONOPHOSPHATE BIOSYNTHETIC PROCESS	142	0	0.000100784
ME10	PENTOSE-PHOSPHATE SHUNT	53	0	0.000148893
ME10	GLUCONEOGENESIS	53	0	0.000144757
ME10	PURINE NUCLEOTIDE BIOSYNTHETIC PROCESS	165	0	0.000140845
ME10	PYRUVATE METABOLIC PROCESS	49	0	0.000226652
ME10	NUCLEOTIDE BIOSYNTHETIC PROCESS	256	0	0.000355759
ME10	PROTEIN TARGETING	395	0	0.000386321
ME10	MITOCHONDRIAL ELECTRON TRANSPORT, UBIQUINOL TO CYTOCHROME C	15	0	0.00041703
ME10	PURINE RIBONUCLEOTIDE BIOSYNTHETIC PROCESS	160	0	0.0004071
ME10	PROTEIN GLYCOSYLATION	155	0	0.000397633
ME10	ENDOCYTOSIS	341	0	0.000584773
ME10	PROTEIN FOLDING	294	0	0.000647368
ME10	METHIONINE METABOLIC PROCESS	36	0	0.000633295
ME10	REGULATION OF APOPTOTIC PROCESS	334	0	0.00061982
ME10	CARBON FIXATION	36	0	0.000606908
ME10	PTERIDINE-CONTAINING COMPOUND METABOLIC PROCESS	28	0	0.000725795
ME10	ATP HYDROLYSIS COUPLED PROTON TRANSPORT	71	0	0.000774987
ME10	RRNA MODIFICATION	23	0	0.000759791
ME10	RETROGRADE VESICLE-MEDIATED TRANSPORT, GOLGI TO ER	68	0	0.000776599
ME10	ATP BIOSYNTHETIC PROCESS	108	0	0.000761947
ME10	NUCLEOTIDE-SUGAR METABOLIC PROCESS	50	0.0022779	0.000778745
ME10	EXTRACELLULAR POLYSACCHARIDE BIOSYNTHETIC PROCESS	46	0.00240964	0.000794084
ME10	METHIONINE BIOSYNTHETIC PROCESS	34	0	0.000838849
ME10	ONE-CARBON METABOLIC PROCESS	32	0	0.000915664
ME10	PORPHYRIN-CONTAINING COMPOUND BIOSYNTHETIC PROCESS	116	0	0.000927463
ME10	PROTON TRANSPORT	152	0	0.000966221
ME10	POSITIVE REGULATION OF TRANSLATIONAL ELONGATION	15	0.00211864	0.00106167
ME10	TETRAPYRROLE BIOSYNTHETIC PROCESS	126	0	0.00112182
ME10	BRANCHED-CHAIN AMINO ACID BIOSYNTHETIC PROCESS	17	0	0.00113027
ME10	NEGATIVE REGULATION OF CATALYTIC ACTIVITY	336	0	0.00113624
ME10	NUCLEOTIDE-SUGAR TRANSPORT	58	0	0.00119423
ME10	FOLIC ACID-CONTAINING COMPOUND METABOLIC PROCESS	25	0	0.00122778
ME10	RNA POLYADENYLATION	51	0	0.00141268
ME10	GLYCINE CATABOLIC PROCESS	23	0.00234742	0.0013916
ME10	PROTEIN IMPORT	202	0	0.00144504
ME10	CHLOROPHYLL BIOSYNTHETIC PROCESS	84	0	0.00144698
ME10	RNA 3'-END PROCESSING	194	0	0.00225398
ME10	ATP METABOLIC PROCESS	306	0	0.00238803
ME10	GTP CATABOLIC PROCESS	329	0	0.00240015
ME10	MALATE METABOLIC PROCESS	19	0.00616016	0.00353451
ME10	NEGATIVE REGULATION OF TRANSLATION	99	0	0.00413193
ME10	ELECTRON TRANSPORT CHAIN	254	0	0.00483375
ME10	PROTEASOME-MEDIATED UBIQUITIN-DEPENDENT PROTEIN CATABOLIC PROCESS	378	0	0.00492405
ME10	AROMATIC AMINO ACID FAMILY BIOSYNTHETIC PROCESS	62	0.00230415	0.0049456
ME10	GLYOXYLATE CYCLE	30	0.00416667	0.00573492
ME10	HISTONE DEACETYLATION	21	0.0040404	0.0068162
ME10	PURINE NUCLEOBASE BIOSYNTHETIC PROCESS	18	0.00688073	0.00674983
ME10	CAROTENOID BIOSYNTHETIC PROCESS	56	0	0.00743587
ME10	DNA-TEMPLATED TRANSCRIPTION, TERMINATION	120	0	0.00799125
ME10	ATP CATABOLIC PROCESS	214	0	0.00793371
ME10	PROTEIN STABILIZATION	41	0.00244499	0.00867292
ME10	POSITIVE REGULATION OF CATALYTIC ACTIVITY	442	0	0.00963008
ME10	HISTIDINE BIOSYNTHETIC PROCESS	16	0.0107066	0.00979149
ME10	REGULATION OF TRANSLATIONAL INITIATION	53	0.00220264	0.0102265
ME10	PROTEIN DEACETYLATION	24	0.00845666	0.0102002
ME10	BRANCHED-CHAIN AMINO ACID METABOLIC PROCESS	40	0.00451467	0.0107053
ME10	FATTY ACID BIOSYNTHETIC PROCESS	249	0	0.0115152
ME10	PURINE NUCLEOBASE METABOLIC PROCESS	31	0.00623701	0.0129539
ME10	PROTEIN IMPORT INTO NUCLEUS	130	0.00248756	0.0139294
ME10	CELLULAR ALDEHYDE METABOLIC PROCESS	103	0.00243902	0.0141206
ME10	INTRA-GOLGI VESICLE-MEDIATED TRANSPORT	62	0	0.0156757
ME10	NUCLEAR-TRANSCRIBED MRNA CATABOLIC PROCESS, NONSENSE-MEDIATED DECAY	65	0.00977995	0.0167458
ME10	L-SERINE METABOLIC PROCESS	35	0.0145833	0.016707
ME10	RNA METHYLATION	32	0.012848	0.0167933
ME10	MRNA CLEAVAGE	35	0.0201342	0.0168307
ME10	TRNA PROCESSING	159	0	0.0176607
ME10	AMINE METABOLIC PROCESS	243	0	0.0179795
ME10	ERGOSTEROL BIOSYNTHETIC PROCESS	16	0.0128755	0.0181316
ME10	MRNA CATABOLIC PROCESS	206	0	0.019106
ME10	IRON ION TRANSPORT	114	0	0.0194102
ME10	CELLULAR IRON ION HOMEOSTASIS	74	0.00436681	0.0208143
ME10	REGULATION OF CHLOROPHYLL BIOSYNTHETIC PROCESS	41	0.0109649	0.022411
ME10	STEROL METABOLIC PROCESS	113	0.002457	0.0237133
ME10	PSEUDOURIDINE SYNTHESIS	23	0.0217865	0.0253195
ME10	CERAMIDE METABOLIC PROCESS	32	0.0274841	0.0261798
ME10	NUCLEOSOME ASSEMBLY	98	0.00705882	0.0262413
ME10	GENE SILENCING BY RNA	101	0.00488998	0.027948
ME10	RESPIRATORY CHAIN COMPLEX IV ASSEMBLY	20	0.0340909	0.031266
ME10	PHOTOSYNTHETIC ELECTRON TRANSPORT IN PHOTOSYSTEM II	16	0.0409091	0.0343753
ME10	ARGININE METABOLIC PROCESS	16	0.0311111	0.0373347
ME10	AROMATIC AMINO ACID FAMILY METABOLIC PROCESS	93	0.00915332	0.0402359
ME10	TRNA WOBBLE URIDINE MODIFICATION	17	0.0534188	0.041894
ME10	ER TO GOLGI VESICLE-MEDIATED TRANSPORT	159	0	0.0419919
ME10	TRANSCRIPTION INITIATION FROM RNA POLYMERASE II PROMOTER	90	0.00954654	0.0430785
ME10	PROTEIN REFOLDING	38	0.0282609	0.043258
ME10	FATTY ACID METABOLIC PROCESS	445	0	0.0429358
ME10	GLYCINE METABOLIC PROCESS	32	0.0249433	0.0435316
ME10	REGULATION OF PROTEIN CATABOLIC PROCESS	122	0.0141176	0.0440279
ME10	GOLGI VESICLE TRANSPORT	349	0	0.0436824
ME10	GLUTAMINE METABOLIC PROCESS	33	0.0349345	0.0488193
ME11	TRYPTOPHAN BIOSYNTHETIC PROCESS	33	0	0.00159232
ME11	FLAVONOID BIOSYNTHETIC PROCESS	244	0	0.0262417
ME11	REGULATION OF CHLOROPHYLL BIOSYNTHETIC PROCESS	41	0	0.0212095
ME11	L-PHENYLALANINE CATABOLIC PROCESS	17	0	0.0161071
ME11	TRYPTOPHAN METABOLIC PROCESS	43	0	0.0131983
ME11	RESPONSE TO FREEZING	74	0	0.0112594
ME11	AROMATIC AMINO ACID FAMILY BIOSYNTHETIC PROCESS	62	0	0.0105298
ME11	THYLAKOID MEMBRANE ORGANIZATION	40	0	0.00981732
ME11	CHROMATIN REMODELING	105	0	0.0110186
ME11	SPLICEOSOMAL COMPLEX ASSEMBLY	68	0	0.0107771
ME11	AROMATIC AMINO ACID FAMILY METABOLIC PROCESS	93	0	0.00993388
ME11	DNA METHYLATION	44	0.00177936	0.0108116
ME11	RNA MODIFICATION	325	0	0.0103961
ME11	ATP-DEPENDENT CHROMATIN REMODELING	33	0	0.012367
ME11	ARGININE METABOLIC PROCESS	16	0.00714286	0.0213476
ME11	CHLOROPHYLL BIOSYNTHETIC PROCESS	84	0.00167504	0.0235576
ME11	PHOTOSYNTHESIS, LIGHT REACTION	157	0.00160256	0.0252462
ME11	PROTEIN-CHROMOPHORE LINKAGE	26	0.0140105	0.0325925
ME11	REGULATION OF MERISTEM STRUCTURAL ORGANIZATION	46	0.00335008	0.038507
ME11	RECOGNITION OF POLLEN	51	0.0036036	0.0369319
ME12	(1->3)-BETA-D-GLUCAN BIOSYNTHETIC PROCESS	17	0	0.00518146
ME12	POLYSACCHARIDE CATABOLIC PROCESS	184	0	0.00651528
ME12	RESPONSE TO DESICCATION	67	0	0.00608285
ME12	POSITIVE REGULATION OF TRANSCRIPTION, DNA-TEMPLATED	401	0	0.0150603
ME12	CYTOKININ METABOLIC PROCESS	41	0.0018018	0.0311813
ME12	COPPER ION TRANSMEMBRANE TRANSPORT	26	0.0102389	0.0267178
ME12	REGULATION OF MERISTEM STRUCTURAL ORGANIZATION	46	0.00330579	0.0294896
ME12	DEFENSE RESPONSE TO FUNGUS	490	0	0.0374812
ME12	AUTOPHAGIC VACUOLE ASSEMBLY	24	0.0051458	0.0369701
ME12	COPPER ION TRANSPORT	34	0	0.0371295
ME12	SUCROSE METABOLIC PROCESS	74	0.00318979	0.0456017
ME13	RESPIRATORY ELECTRON TRANSPORT CHAIN	96	0	0
ME13	ATP SYNTHESIS COUPLED ELECTRON TRANSPORT	62	0	0
ME13	ATP SYNTHESIS COUPLED PROTON TRANSPORT	73	0	0
ME13	RETROGRADE VESICLE-MEDIATED TRANSPORT, GOLGI TO ER	68	0	0
ME13	TRICARBOXYLIC ACID CYCLE	53	0	0
ME13	EXTRACELLULAR POLYSACCHARIDE BIOSYNTHETIC PROCESS	46	0	0
ME13	AEROBIC RESPIRATION	119	0	0
ME13	GOLGI VESICLE TRANSPORT	349	0	0.000160276
ME13	NUCLEOTIDE-SUGAR TRANSPORT	58	0	0.000465014
ME13	ER TO GOLGI VESICLE-MEDIATED TRANSPORT	159	0	0.000418513
ME13	PROTEIN GLYCOSYLATION	155	0	0.000380466
ME13	INTRA-GOLGI VESICLE-MEDIATED TRANSPORT	62	0	0.00034876
ME13	MITOCHONDRIAL ELECTRON TRANSPORT, UBIQUINOL TO CYTOCHROME C	15	0	0.000321933
ME13	RESPIRATORY GASEOUS EXCHANGE	15	0	0.000298938
ME13	GLYOXYLATE CYCLE	30	0	0.000279008
ME13	ELECTRON TRANSPORT CHAIN	254	0	0.000712675
ME13	GLYCINE CATABOLIC PROCESS	23	0	0.000670753
ME13	PROTON TRANSPORT	152	0	0.000633489
ME13	ACYL-COA METABOLIC PROCESS	76	0	0.000743101
ME13	ATP BIOSYNTHETIC PROCESS	108	0	0.000775151
ME13	CELLULAR COPPER ION HOMEOSTASIS	25	0	0.000878953
ME13	ATP HYDROLYSIS COUPLED PROTON TRANSPORT	71	0	0.00110238
ME13	MITOCHONDRIAL ELECTRON TRANSPORT, NADH TO UBIQUINONE	25	0	0.00111346
ME13	VACUOLAR TRANSPORT	175	0	0.00113673
ME13	NUCLEOTIDE-SUGAR METABOLIC PROCESS	50	0	0.00109126
ME13	PURINE RIBONUCLEOSIDE MONOPHOSPHATE BIOSYNTHETIC PROCESS	125	0	0.00182683
ME13	CELLULAR IRON ION HOMEOSTASIS	74	0	0.00228329
ME13	PROTEIN RETENTION IN ER LUMEN	28	0	0.00220174
ME13	PROTEASOME-MEDIATED UBIQUITIN-DEPENDENT PROTEIN CATABOLIC PROCESS	378	0	0.00212582
ME13	REGULATION OF ARF PROTEIN SIGNAL TRANSDUCTION	41	0.0021645	0.00248666
ME13	GTP CATABOLIC PROCESS	329	0	0.00363825
ME13	PROTEIN N-LINKED GLYCOSYLATION	76	0	0.00378893
ME13	PURINE NUCLEOTIDE BIOSYNTHETIC PROCESS	165	0	0.00388255
ME13	POSITIVE REGULATION OF CATALYTIC ACTIVITY	442	0	0.00380933
ME13	PURINE RIBONUCLEOTIDE BIOSYNTHETIC PROCESS	160	0	0.00373902
ME13	CYTOCHROME COMPLEX ASSEMBLY	26	0.00222717	0.00375134
ME13	PYRUVATE METABOLIC PROCESS	49	0	0.0038371
ME13	REGULATION OF PH	45	0	0.00448784
ME13	CELL WALL BIOGENESIS	310	0	0.00449149
ME13	RIBONUCLEOSIDE MONOPHOSPHATE BIOSYNTHETIC PROCESS	142	0	0.00458908
ME13	VESICLE FUSION WITH GOLGI APPARATUS	26	0	0.00464869
ME13	GLYCOLYSIS	111	0	0.00498052
ME13	PROTEIN TARGETING	395	0	0.00564484
ME13	ONE-CARBON METABOLIC PROCESS	32	0.00219298	0.00571046
ME13	GLUCOSE CATABOLIC PROCESS	160	0	0.00577386
ME13	HEXOSE METABOLIC PROCESS	283	0	0.0129219
ME13	VESICLE DOCKING	28	0.00428265	0.0132873
ME13	CELLULAR HOMEOSTASIS	472	0	0.0142021
ME13	CELLULAR AMINO ACID CATABOLIC PROCESS	99	0.00220264	0.0142736
ME13	REGULATION OF ARF GTPASE ACTIVITY	29	0.00426439	0.0140701
ME13	GLUCOSE METABOLIC PROCESS	241	0	0.0140383
ME13	METHIONINE METABOLIC PROCESS	36	0	0.0152328
ME13	RESPIRATORY CHAIN COMPLEX IV ASSEMBLY	20	0.0130152	0.0159777
ME13	MITOCHONDRIAL TRANSPORT	115	0	0.0198245
ME13	GLYCINE METABOLIC PROCESS	32	0.00416667	0.0216875
ME13	TRANSLATIONAL INITIATION	153	0	0.0220302
ME13	COFACTOR BIOSYNTHETIC PROCESS	244	0	0.0220722
ME13	CARBOHYDRATE TRANSPORT	165	0	0.0223155
ME13	IRON-SULFUR CLUSTER ASSEMBLY	25	0.00824742	0.022318
ME13	CELLULOSE BIOSYNTHETIC PROCESS	49	0.0131579	0.0221244
ME13	REGULATION OF SMALL GTPASE MEDIATED SIGNAL TRANSDUCTION	150	0	0.022346
ME13	MO-MOLYBDOPTERIN COFACTOR BIOSYNTHETIC PROCESS	15	0.0101833	0.0221908
ME13	ENDOCYTOSIS	341	0	0.0232589
ME13	NUCLEOTIDE BIOSYNTHETIC PROCESS	256	0	0.0229171
ME13	ANAPHASE-PROMOTING COMPLEX-DEPENDENT PROTEASOMAL UBIQUITIN-DEPENDENT PROTEIN CATABOLIC PROCESS	145	0	0.0240673
ME13	ATP METABOLIC PROCESS	306	0	0.0276366
ME13	REGULATION OF PROTEIN CATABOLIC PROCESS	122	0	0.0286568
ME13	PROTEIN POLYMERIZATION	132	0	0.0287453
ME13	REGULATION OF APOPTOTIC PROCESS	334	0	0.0290238
ME13	COFACTOR METABOLIC PROCESS	456	0	0.0286733
ME13	EXOCYTOSIS	114	0.00222222	0.0347149
ME13	CYSTEINE METABOLIC PROCESS	26	0.0289256	0.0368786
ME13	PROTEIN N-LINKED GLYCOSYLATION VIA ASPARAGINE	51	0.0108225	0.0372478
ME13	PHOTOSYNTHETIC ELECTRON TRANSPORT IN PHOTOSYSTEM II	16	0.0377359	0.0390918
ME13	GPI ANCHOR METABOLIC PROCESS	38	0.0210084	0.0420551
ME13	CELL ADHESION	104	0.0110375	0.0417411
ME13	REGULATION OF TRANSLATIONAL INITIATION	53	0.00674157	0.0412561
ME13	ACTIN CYTOSKELETON ORGANIZATION	221	0.00224215	0.0460379
ME13	PENTOSE-PHOSPHATE SHUNT	53	0.0207039	0.04725
ME13	NEGATIVE REGULATION OF CATALYTIC ACTIVITY	336	0	0.0489105
ME13	CERAMIDE METABOLIC PROCESS	32	0.0269151	0.0495657
ME17	NUCLEOSOME ASSEMBLY	98	0	0
ME17	TELOMERE MAINTENANCE	90	0	0
ME17	DNA-DEPENDENT DNA REPLICATION	122	0	0
ME17	CHROMATIN ASSEMBLY OR DISASSEMBLY	142	0	0
ME17	TRANSLATIONAL TERMINATION	353	0	0
ME17	TRANSLATIONAL ELONGATION	394	0	0
ME17	DNA REPLICATION INITIATION	28	0	0
ME17	RRNA PROCESSING	291	0	0
ME17	RIBOSOME BIOGENESIS	467	0	0
ME17	DOUBLE-STRAND BREAK REPAIR VIA HOMOLOGOUS RECOMBINATION	58	0	0
ME17	DNA REPLICATION	250	0	0.000130938
ME17	REGULATION OF DNA REPLICATION	87	0	0.000120026
ME17	DOUBLE-STRAND BREAK REPAIR	119	0	0.000223804
ME17	RRNA MODIFICATION	23	0	0.000364212
ME17	ATP-DEPENDENT CHROMATIN REMODELING	33	0	0.000819576
ME17	CHLOROPHYLL BIOSYNTHETIC PROCESS	84	0	0.00103985
ME17	PHOSPHATIDYLINOSITOL-MEDIATED SIGNALING	42	0	0.0060444
ME17	RNA MODIFICATION	325	0	0.00587374
ME17	RNA METHYLATION	32	0.00309598	0.00617931
ME17	REGULATION OF TRANSLATIONAL FIDELITY	36	0	0.00757481
ME17	ARGININE METABOLIC PROCESS	16	0.00471698	0.00860005
ME17	PHOTOSYNTHESIS, LIGHT HARVESTING	39	0.00151976	0.0123703
ME17	L-PHENYLALANINE CATABOLIC PROCESS	17	0.0066778	0.0123935
ME17	REGULATION OF CYCLIN-DEPENDENT PROTEIN SERINE/THREONINE KINASE ACTIVITY	40	0.00294551	0.0154867
ME17	PROTEIN-CHROMOPHORE LINKAGE	26	0.0105263	0.0156559
ME17	RECIPROCAL MEIOTIC RECOMBINATION	48	0.00145138	0.0160373
ME17	DNA RECOMBINATION	228	0	0.0154696
ME17	PORPHYRIN-CONTAINING COMPOUND BIOSYNTHETIC PROCESS	116	0	0.0164539
ME17	MICROTUBULE-BASED MOVEMENT	146	0	0.0182031
ME17	CHROMATIN REMODELING	105	0.0013369	0.0254883
ME17	TETRAPYRROLE BIOSYNTHETIC PROCESS	126	0.00129199	0.0295063
ME17	DNA-TEMPLATED TRANSCRIPTION, INITIATION	140	0.00132275	0.0481293
ME18	TRANSLATIONAL TERMINATION	353	0	0
ME18	TRANSLATIONAL ELONGATION	394	0	0
ME18	RESPIRATORY ELECTRON TRANSPORT CHAIN	96	0	0
ME18	ATP SYNTHESIS COUPLED ELECTRON TRANSPORT	62	0	0
ME18	ATP SYNTHESIS COUPLED PROTON TRANSPORT	73	0	0
ME18	ATP HYDROLYSIS COUPLED PROTON TRANSPORT	71	0	0
ME18	RETROGRADE VESICLE-MEDIATED TRANSPORT, GOLGI TO ER	68	0	0
ME18	VACUOLAR TRANSPORT	175	0	0
ME18	GOLGI VESICLE TRANSPORT	349	0	0
ME18	ER TO GOLGI VESICLE-MEDIATED TRANSPORT	159	0	0
ME18	MITOCHONDRIAL ELECTRON TRANSPORT, UBIQUINOL TO CYTOCHROME C	15	0	0
ME18	ANAPHASE-PROMOTING COMPLEX-DEPENDENT PROTEASOMAL UBIQUITIN-DEPENDENT PROTEIN CATABOLIC PROCESS	145	0	0
ME18	INTRA-GOLGI VESICLE-MEDIATED TRANSPORT	62	0	0
ME18	VESICLE FUSION WITH GOLGI APPARATUS	26	0	0
ME18	PROTEIN TARGETING	395	0	0
ME18	REGULATION OF PH	45	0	0
ME18	PROTEIN N-LINKED GLYCOSYLATION	76	0	0
ME18	PROTON TRANSPORT	152	0	0
ME18	RETROGRADE TRANSPORT, ENDOSOME TO GOLGI	42	0	0
ME18	ELECTRON TRANSPORT CHAIN	254	0	0
ME18	ATP BIOSYNTHETIC PROCESS	108	0	0
ME18	PROTEIN N-LINKED GLYCOSYLATION VIA ASPARAGINE	51	0	0
ME18	MITOCHONDRIAL ELECTRON TRANSPORT, NADH TO UBIQUINONE	25	0	0
ME18	PROTEIN GLYCOSYLATION	155	0	0
ME18	AEROBIC RESPIRATION	119	0	0
ME18	GTP CATABOLIC PROCESS	329	0	0
ME18	TRICARBOXYLIC ACID CYCLE	53	0	0
ME18	PROTEASOME-MEDIATED UBIQUITIN-DEPENDENT PROTEIN CATABOLIC PROCESS	378	0	0
ME18	RIBOSOME ASSEMBLY	96	0	0
ME18	TRANSLATIONAL INITIATION	153	0	0
ME18	REGULATION OF TRANSLATIONAL FIDELITY	36	0	0
ME18	PROTEIN RETENTION IN ER LUMEN	28	0	5.67354e-05
ME18	PURINE RIBONUCLEOSIDE MONOPHOSPHATE BIOSYNTHETIC PROCESS	125	0	5.50162e-05
ME18	POSITIVE REGULATION OF CATALYTIC ACTIVITY	442	0	0.000105779
ME18	CELLULAR IRON ION HOMEOSTASIS	74	0	0.000102757
ME18	VESICLE DOCKING	28	0	9.99024e-05
ME18	ENDOCYTOSIS	341	0	0.000145336
ME18	PURINE RIBONUCLEOTIDE BIOSYNTHETIC PROCESS	160	0	0.000188379
ME18	MITOCHONDRIAL TRANSPORT	115	0	0.000183548
ME18	REGULATION OF APOPTOTIC PROCESS	334	0	0.00017896
ME18	CYTOCHROME COMPLEX ASSEMBLY	26	0	0.000289573
ME18	NUCLEOTIDE-SUGAR TRANSPORT	58	0	0.000282678
ME18	RESPIRATORY CHAIN COMPLEX IV ASSEMBLY	20	0	0.000276104
ME18	PURINE NUCLEOTIDE BIOSYNTHETIC PROCESS	165	0	0.00030882
ME18	RIBONUCLEOSIDE MONOPHOSPHATE BIOSYNTHETIC PROCESS	142	0	0.000442299
ME18	EXOCYTOSIS	114	0	0.000545564
ME18	AUTOPHAGIC VACUOLE ASSEMBLY	24	0	0.000708073
ME18	RESPIRATORY GASEOUS EXCHANGE	15	0	0.000724488
ME18	GPI ANCHOR METABOLIC PROCESS	38	0	0.000810541
ME18	SMALL GTPASE MEDIATED SIGNAL TRANSDUCTION	318	0	0.0014671
ME18	PROTEIN POLYMERIZATION	132	0	0.00177693
ME18	IRON ION TRANSPORT	114	0	0.00211959
ME18	GPI ANCHOR BIOSYNTHETIC PROCESS	25	0.00241546	0.00214206
ME18	VESICLE DOCKING INVOLVED IN EXOCYTOSIS	23	0	0.0022031
ME18	RIBOSOME BIOGENESIS	467	0	0.00249326
ME18	PHAGOCYTOSIS	47	0	0.00244874
ME18	CELLULAR COPPER ION HOMEOSTASIS	25	0	0.00258401
ME18	NUCLEOTIDE-SUGAR METABOLIC PROCESS	50	0	0.00273527
ME18	ACYL-COA METABOLIC PROCESS	76	0	0.00280005
ME18	EXTRACELLULAR POLYSACCHARIDE BIOSYNTHETIC PROCESS	46	0	0.00283297
ME18	GLUCOSE CATABOLIC PROCESS	160	0	0.00333595
ME18	CELL CYCLE ARREST	179	0	0.00423786
ME18	NEGATIVE REGULATION OF CATALYTIC ACTIVITY	336	0	0.00428121
ME18	GLUCONEOGENESIS	53	0	0.00455131
ME18	GLYCOLYSIS	111	0	0.00537045
ME18	NUCLEOTIDE BIOSYNTHETIC PROCESS	256	0	0.00598476
ME18	ACTIN FILAMENT POLYMERIZATION	44	0	0.00666773
ME18	CERAMIDE METABOLIC PROCESS	32	0.00251256	0.00656968
ME18	GLYOXYLATE CYCLE	30	0.00248139	0.00652336
ME18	NUCLEOCYTOPLASMIC TRANSPORT	390	0	0.00828826
ME18	PENTOSE-PHOSPHATE SHUNT	53	0	0.00867462
ME18	RRNA PROCESSING	291	0	0.00924937
ME18	G-PROTEIN COUPLED RECEPTOR SIGNALING PATHWAY	76	0.00526316	0.00946636
ME18	CELL REDOX HOMEOSTASIS	152	0	0.00953707
ME18	ONE-CARBON METABOLIC PROCESS	32	0.00966184	0.0105058
ME18	HEXOSE METABOLIC PROCESS	283	0	0.0112136
ME18	GLUCOSE METABOLIC PROCESS	241	0	0.011247
ME18	CELLULAR HOMEOSTASIS	472	0	0.0115405
ME18	AMINE METABOLIC PROCESS	243	0	0.0133122
ME18	SPHINGOLIPID METABOLIC PROCESS	83	0.00531915	0.0138559
ME18	REGULATION OF PROTEIN CATABOLIC PROCESS	122	0.00318471	0.0151171
ME18	PROTEIN TARGETING TO MITOCHONDRION	70	0	0.0159439
ME18	PROTEIN IMPORT	202	0	0.0160839
ME18	ACTIN CYTOSKELETON ORGANIZATION	221	0	0.0158925
ME18	GLYCINE CATABOLIC PROCESS	23	0.0170316	0.0160179
ME18	ATP METABOLIC PROCESS	306	0	0.0172399
ME18	PYRUVATE METABOLIC PROCESS	49	0.0130548	0.0227204
ME18	REGULATION OF ARF GTPASE ACTIVITY	29	0.026764	0.0225588
ME18	PROTEIN IMPORT INTO NUCLEUS	130	0	0.0263634
ME18	GLYCOLIPID BIOSYNTHETIC PROCESS	41	0.00771208	0.0290535
ME18	CELLULAR ALDEHYDE METABOLIC PROCESS	103	0.00318471	0.0303786
ME18	REGULATION OF ACTIN FILAMENT POLYMERIZATION	47	0.0152284	0.0305771
ME18	METHIONINE METABOLIC PROCESS	36	0.0225564	0.0311693
ME18	COFACTOR METABOLIC PROCESS	456	0	0.031096
ME18	MALATE METABOLIC PROCESS	19	0.016317	0.031309
ME18	PHOSPHATIDYLINOSITOL METABOLIC PROCESS	97	0	0.0319915
ME18	GLYCINE METABOLIC PROCESS	32	0.0179028	0.0327568
ME18	PEROXISOME ORGANIZATION	49	0.0175879	0.0324381
ME18	COFACTOR BIOSYNTHETIC PROCESS	244	0	0.0342872
ME18	REGULATION OF ARF PROTEIN SIGNAL TRANSDUCTION	41	0.021164	0.034819
ME18	GLYCEROL ETHER METABOLIC PROCESS	18	0.0462963	0.0390677
ME18	FATTY ACID BETA-OXIDATION	56	0.0338542	0.0466236
ME18	AUTOPHAGY	93	0.0028169	0.0467892
ME18	REGULATION OF TRANSLATIONAL INITIATION	53	0.0345745	0.048914
ME20	TRANSLATIONAL ELONGATION	394	0	0
ME20	TRANSLATIONAL TERMINATION	353	0	0
ME20	RIBOSOME BIOGENESIS	467	0	0
ME20	RRNA PROCESSING	291	0	0
ME20	RNA MODIFICATION	325	0	0
ME20	TUBULIN COMPLEX ASSEMBLY	21	0	0
ME20	CHLOROPHYLL BIOSYNTHETIC PROCESS	84	0	0
ME20	RIBOSOME ASSEMBLY	96	0	0
ME20	REGULATION OF TRANSLATIONAL FIDELITY	36	0	0
ME20	NUCLEOSOME ASSEMBLY	98	0	0
ME20	RRNA MODIFICATION	23	0	9.83957e-05
ME20	REGULATION OF CHLOROPHYLL BIOSYNTHETIC PROCESS	41	0	0.000174445
ME20	DNA-DEPENDENT DNA REPLICATION	122	0	0.000238795
ME20	PORPHYRIN-CONTAINING COMPOUND BIOSYNTHETIC PROCESS	116	0	0.000364234
ME20	GENE SILENCING BY RNA	101	0	0.000406618
ME20	ATP-DEPENDENT CHROMATIN REMODELING	33	0	0.00126487
ME20	RNA METHYLATION	32	0	0.00125027
ME20	THYLAKOID MEMBRANE ORGANIZATION	40	0	0.00151669
ME20	TELOMERE MAINTENANCE	90	0	0.00180286
ME20	REGULATION OF DNA REPLICATION	87	0	0.00181392
ME20	PSEUDOURIDINE SYNTHESIS	23	0.00189036	0.00177705
ME20	TETRAPYRROLE BIOSYNTHETIC PROCESS	126	0	0.00183545
ME20	CHROMATIN ASSEMBLY OR DISASSEMBLY	142	0	0.00327544
ME20	DNA REPLICATION	250	0	0.00338775
ME20	TRNA PROCESSING	159	0	0.00385288
ME20	ARGININE METABOLIC PROCESS	16	0	0.00401852
ME20	PTERIDINE-CONTAINING COMPOUND METABOLIC PROCESS	28	0.00179533	0.00390672
ME20	AROMATIC AMINO ACID FAMILY METABOLIC PROCESS	93	0	0.00486481
ME20	AROMATIC AMINO ACID FAMILY BIOSYNTHETIC PROCESS	62	0	0.00501999
ME20	POSITIVE REGULATION OF TRANSLATIONAL ELONGATION	15	0.00554529	0.00566056
ME20	CHROMATIN REMODELING	105	0	0.00580506
ME20	FOLIC ACID-CONTAINING COMPOUND METABOLIC PROCESS	25	0.00377358	0.0061861
ME20	DNA REPLICATION INITIATION	28	0.0018315	0.00670657
ME20	CARBON FIXATION	36	0.00181159	0.00653906
ME20	DNA METHYLATION	44	0	0.00640877
ME20	CELLULAR AMINO ACID BIOSYNTHETIC PROCESS	358	0	0.00878391
ME20	METHYLATION	305	0	0.00921315
ME20	TRNA AMINOACYLATION	84	0.00177936	0.0109978
ME20	TRNA AMINOACYLATION FOR PROTEIN TRANSLATION	84	0.00534759	0.012959
ME20	FERROUS IRON TRANSPORT	25	0.00772201	0.0142288
ME20	PHOTOSYNTHESIS	321	0	0.0162253
ME20	SPLICEOSOMAL COMPLEX ASSEMBLY	68	0	0.0170242
ME20	DOUBLE-STRAND BREAK REPAIR	119	0	0.0220571
ME20	PHOTOSYNTHESIS, LIGHT HARVESTING	39	0.00572519	0.0235153
ME20	TRNA MODIFICATION	61	0.00715563	0.0257305
ME20	DNA RECOMBINATION	228	0	0.0268302
ME20	PHOTOSYNTHESIS, LIGHT REACTION	157	0.00170648	0.0267535
ME20	PROTEIN-CHROMOPHORE LINKAGE	26	0.0108696	0.026302
ME20	HISTONE DEACETYLATION	21	0.0136187	0.0279495
ME20	RNA 3'-END PROCESSING	194	0	0.0279455
ME20	DOUBLE-STRAND BREAK REPAIR VIA HOMOLOGOUS RECOMBINATION	58	0.00702988	0.0285011
ME20	TRNA METHYLATION	17	0.0238971	0.0290494
ME20	DNA-TEMPLATED TRANSCRIPTION, TERMINATION	120	0.00347222	0.0300368
ME20	L-PHENYLALANINE CATABOLIC PROCESS	17	0.0224299	0.0319919
ME20	COFACTOR BIOSYNTHETIC PROCESS	244	0	0.0322677
ME20	GENE SILENCING	234	0	0.0317086
ME20	RNA SPLICING	494	0	0.0372832
ME20	MAINTENANCE OF FIDELITY INVOLVED IN DNA-DEPENDENT DNA REPLICATION	15	0.0414313	0.0437528
ME20	POLY(A)+ MRNA EXPORT FROM NUCLEUS	20	0.0249042	0.0463242
ME25	NUCLEOSOME ASSEMBLY	98	0	0.000683258
ME25	TELOMERE MAINTENANCE	90	0	0.0080913
ME25	PROTEIN-CHROMOPHORE LINKAGE	26	0.00326264	0.00651943
ME25	REGULATION OF CHLOROPHYLL BIOSYNTHETIC PROCESS	41	0	0.0052222
ME25	CHLOROPHYLL BIOSYNTHETIC PROCESS	84	0	0.00497952
ME25	RNA MODIFICATION	325	0	0.00570136
ME25	CHROMATIN ASSEMBLY OR DISASSEMBLY	142	0	0.00508394
ME25	FLAVONOID BIOSYNTHETIC PROCESS	244	0	0.00495121
ME25	PHOTOSYNTHESIS, LIGHT HARVESTING	39	0.00157978	0.00665859
ME25	REGULATION OF MERISTEM STRUCTURAL ORGANIZATION	46	0	0.00665419
ME25	DNA REPLICATION INITIATION	28	0	0.00610973
ME25	DNA-DEPENDENT DNA REPLICATION	122	0	0.00644157
ME25	L-PHENYLALANINE CATABOLIC PROCESS	17	0.00171527	0.00922386
ME25	CHROMATIN REMODELING	105	0	0.012196
ME25	POLYSACCHARIDE CATABOLIC PROCESS	184	0	0.013713
ME25	DNA METHYLATION	44	0.00153374	0.01453
ME25	REGULATION OF DNA REPLICATION	87	0.00289855	0.0165104
ME25	ATP-DEPENDENT CHROMATIN REMODELING	33	0.00483092	0.0190877
ME25	DNA REPLICATION	250	0	0.0183325
ME25	THIAMINE BIOSYNTHETIC PROCESS	16	0.00357782	0.0174499
ME25	GENE SILENCING BY RNA	101	0	0.0179501
ME25	ARGININE METABOLIC PROCESS	16	0.0115512	0.0189838
ME25	AROMATIC AMINO ACID FAMILY METABOLIC PROCESS	93	0	0.0215826
ME25	PHOTOSYNTHESIS	321	0	0.0228844
ME25	THYLAKOID MEMBRANE ORGANIZATION	40	0.00947867	0.0234742
ME25	RRNA MODIFICATION	23	0.00496689	0.0238142
ME25	PHOTOSYNTHESIS, LIGHT REACTION	157	0.00134409	0.0283187
ME25	DOUBLE-STRAND BREAK REPAIR	119	0.00271739	0.0472267
ME25	DOUBLE-STRAND BREAK REPAIR VIA HOMOLOGOUS RECOMBINATION	58	0.00629921	0.0498205
